# Supplementary material
Source: PubMed Central journal article supplement (PMC4162501)

**Impact of informative censoring on the Kaplan-Meier estimate of progression-free survival in phase II clinical trials**

**Campigotto, et al**

## Supplemental materials

The piecewise exponential model for the survival function  $S(t)$  used in the simulations is

$$S(t) = (1-p) \exp(-\lambda_1 (t-a_1) I(t \geq a_1)) + (p) \exp(-\lambda_2(t-a_2) I(t \geq a_2));$$

where  $I(a)$  is the indicator function which is equal to 1 if  $t \geq a$  and 0 otherwise,  $a_1 = a_2 = 2$  in the WM simulations,  $a_1 = 2$  and  $a_2 = 6$  in the MM simulations,  $t$  is the time from the first day of the first cycle of investigational treatment,  $p$  is the proportion of patients who are informatively censored,  $\lambda_1$  is the hazard rate per month for the patients who continue on therapy until progression and  $\lambda_2$  is the hazard rate per month for those who initiate non-protocol therapy or undergo transplantation prior to progression.

The piecewise model allows for the two different hazard rate parameters for those who stay on study ( $\lambda_1$ ) versus those who are informatively censored ( $\lambda_2$ ) and for flexibility in defining when failure times start. For example, WM and MM disease evaluations are often not done until after 2 cycles of therapy (approximately 2 months). Therefore, no failures are generated before 2 months in the simulations. In addition for MM, no failures are generated before 6 months for the patients who continue to transplant since patients usually receive a 4 to 6 induction cycles prior to transplant. For the WM simulated data, the time of NPT prior to progression are generated dependent on the failure time and is restricted to occur 1 to 2 months prior to progression time based on uniform distribution. The data is generated in this manner because in practice if patients are taken off study due to inadequate response or clinical signs of progression, another therapy is often initiated, indicating potential higher risk for progression. For the MM simulations, the time of ASCT are generated based on random uniform distribution between 4 and 6 months.

For 5 newly diagnosed WM scenarios, there were at most 6/2000 (0.3%) simulations where the median PFS was not reached. In those cases, the mean and the standard error of the bias were calculated using the simulated data sets where the median PFS was reached. The mean of the 2000 estimates is compared to the true values based on the piecewise model and percent relative mean bias (defined as  $[\text{mean of 2000 estimates} - \text{true value}] / \text{true value}$ ) are reported. The mean of the 2000 estimated Greenwood' standard errors of the KM estimate and the standard error of the 2000 biases of the KM estimates are also provided.

## Supplementary tables

**Table 1. Distribution of the relative (%) bias of the 12-month progression-free survival estimation (in months) of newly diagnosed WM patients by scenario. We assumed that the hazard rate of progression for those who remained on therapy is 0.03 (to simulate upfront WM patients), and that the administrative censoring started from 48 months after initiation of therapy. Number of simulated data: B=2000.**

| parameters |             |                            | True Median PFS | Summary Statistics from simulations of the estimated KM Median PFS |                 |       |        | Relative (%) bias: Median PFS |            |        |        | True 12-month PFS | Summary Statistics from simulations of the estimated KM 12 month PFS |                 |      |       | Relative (%) bias: 12 Month PFS |            |        |       |
|------------|-------------|----------------------------|-----------------|--------------------------------------------------------------------|-----------------|-------|--------|-------------------------------|------------|--------|--------|-------------------|----------------------------------------------------------------------|-----------------|------|-------|---------------------------------|------------|--------|-------|
| N          | $\lambda_2$ | % discontinued prior to PD |                 | median                                                             | Mean Std. error | min   | max    | mean                          | Std. error | min    | max    |                   | median                                                               | Mean Std. error | min  | max   | mean                            | Std. error | min    | max   |
| 25         | 0.03        | 0.01                       | 25.10           | 25.30                                                              | 0.10            | 9.51  | 56.55  | 3.62                          | 0.62       | -62.13 | 125.27 | 0.74              | 0.76                                                                 | 0.09            | 0.44 | 0.96  | 0.15                            | 0.26       | -40.58 | 29.64 |
|            |             | 0.1                        | 25.10           | 27.50                                                              | 0.10            | 9.51  | 60.64  | 12.41                         | 0.68       | -62.13 | 141.55 | 0.74              | 0.76                                                                 | 0.08            | 0.44 | 1.00  | 2.91                            | 0.26       | -40.53 | 35.58 |
|            |             | 0.2                        | 25.10           | 30.64                                                              | 0.11            | 11.21 | 78.40  | 26.12                         | 0.77       | -55.36 | 212.29 | 0.73              | 0.79                                                                 | 0.08            | 0.43 | 1.00  | 6.96                            | 0.25       | -40.79 | 36.18 |
|            |             | 0.3                        | 25.10           | 35.15                                                              | 0.11            | 11.31 | 84.40  | 45.01                         | 0.89       | -54.95 | 236.18 | 0.73              | 0.83                                                                 | 0.08            | 0.49 | 1.00  | 11.28                           | 0.24       | -33.62 | 36.79 |
|            |             | 0.4                        | 25.10           | 39.25                                                              | 0.12            | 12.59 | 84.40  | 61.42                         | 0.99       | -49.86 | 251.84 | 0.73              | 0.83                                                                 | 0.07            | 0.53 | 1.00  | 14.46                           | 0.23       | -26.53 | 37.40 |
|            | 0.06        | 0.01                       | 24.94           | 25.30                                                              | 0.10            | 9.51  | 56.55  | 4.31                          | 0.63       | -61.88 | 126.77 | 0.74              | 0.76                                                                 | 0.08            | 0.44 | 0.96  | 0.43                            | 0.26       | -40.41 | 30.01 |
|            |             | 0.1                        | 22.19           | 26.68                                                              | 0.10            | 9.51  | 60.64  | 23.61                         | 0.75       | -57.16 | 173.28 | 0.72              | 0.76                                                                 | 0.08            | 0.43 | 1.00  | 5.46                            | 0.27       | -39.91 | 39.49 |
|            |             | 0.2                        | 21.96           | 28.69                                                              | 0.11            | 9.51  | 78.40  | 34.78                         | 0.84       | -56.70 | 257.05 | 0.69              | 0.78                                                                 | 0.09            | 0.43 | 1.00  | 12.38                           | 0.28       | -37.26 | 44.30 |
|            |             | 0.3                        | 20.54           | 31.46                                                              | 0.12            | 11.31 | 84.40  | 58.57                         | 1.00       | -44.94 | 310.89 | 0.67              | 0.81                                                                 | 0.09            | 0.46 | 1.00  | 20.09                           | 0.28       | -30.77 | 49.46 |
|            |             | 0.4                        | 19.23           | 33.70                                                              | 0.12            | 11.22 | 84.40  | 81.54                         | 1.13       | -41.68 | 338.78 | 0.65              | 0.82                                                                 | 0.09            | 0.46 | 1.00  | 27.31                           | 0.28       | -28.05 | 55.00 |
|            | 0.12        | 0.01                       | 24.81           | 25.30                                                              | 0.10            | 9.51  | 56.55  | 4.84                          | 0.63       | -61.69 | 127.92 | 0.74              | 0.76                                                                 | 0.08            | 0.44 | 0.96  | 0.77                            | 0.26       | -40.21 | 30.45 |
|            |             | 0.1                        | 22.19           | 25.62                                                              | 0.10            | 8.35  | 57.67  | 19.27                         | 0.73       | -62.38 | 159.89 | 0.69              | 0.75                                                                 | 0.08            | 0.41 | 1.00  | 8.65                            | 0.29       | -41.18 | 44.53 |
| 0.2        |             | 19.37                      | 27.16           | 0.11                                                               | 9.51            | 63.04 | 45.10  | 0.95                          | -50.91     | 225.46 | 0.64   | 0.77              | 0.09                                                                 | 0.41            | 1.00 | 19.51 | 0.32                            | -36.45     | 55.52  |       |
| 0.3        |             | 16.79                      | 28.23           | 0.12                                                               | 9.96            | 65.83 | 74.29  | 1.14                          | -40.66     | 292.04 | 0.59   | 0.80              | 0.09                                                                 | 0.40            | 1.00 | 32.54 | 0.35                            | -32.53     | 68.32  |       |
| 0.4        |             | 14.57                      | 29.44           | 0.13                                                               | 9.87            | 84.40 | 110.82 | 1.43                          | -32.29     | 479.23 | 0.55   | 0.81              | 0.09                                                                 | 0.41            | 1.00 | 47.08 | 0.37                            | -24.98     | 83.42  |       |
| 40         | 0.03        | 0.01                       | 25.10           | 25.03                                                              | 0.08            | 12.41 | 46.60  | 1.54                          | 0.46       | -50.57 | 85.61  | 0.74              | 0.75                                                                 | 0.07            | 0.50 | 0.95  | -0.07                           | 0.21       | -32.48 | 28.29 |
|            |             | 0.1                        | 25.10           | 27.51                                                              | 0.08            | 13.04 | 51.82  | 11.64                         | 0.51       | -48.04 | 106.40 | 0.74              | 0.77                                                                 | 0.07            | 0.51 | 0.95  | 3.27                            | 0.20       | -30.69 | 28.63 |
|            |             | 0.2                        | 25.10           | 30.50                                                              | 0.08            | 13.19 | 66.96  | 23.70                         | 0.58       | -47.45 | 166.74 | 0.73              | 0.79                                                                 | 0.07            | 0.52 | 0.97  | 6.66                            | 0.19       | -28.59 | 32.69 |
|            |             | 0.3                        | 25.10           | 34.55                                                              | 0.09            | 14.57 | 75.94  | 40.13                         | 0.66       | -41.95 | 202.47 | 0.73              | 0.81                                                                 | 0.06            | 0.57 | 0.98  | 10.44                           | 0.19       | -21.88 | 33.37 |
|            |             | 0.4                        | 25.10           | 39.93                                                              | 0.09            | 17.23 | 88.47  | 61.72                         | 0.79       | -31.38 | 252.40 | 0.73              | 0.84                                                                 | 0.06            | 0.63 | 1.00  | 14.44                           | 0.18       | -13.97 | 37.40 |
|            | 0.06        | 0.01                       | 24.94           | 25.03                                                              | 0.08            | 12.41 | 46.60  | 2.22                          | 0.46       | -50.24 | 86.85  | 0.74              | 0.75                                                                 | 0.08            | 0.50 | 0.95  | 0.21                            | 0.21       | -32.29 | 28.65 |
|            |             | 0.1                        | 22.19           | 26.80                                                              | 0.08            | 12.74 | 51.12  | 22.32                         | 0.56       | -42.56 | 130.37 | 0.72              | 0.76                                                                 | 0.08            | 0.50 | 0.95  | 5.74                            | 0.21       | -29.85 | 32.34 |
|            |             | 0.2                        | 21.96           | 28.67                                                              | 0.09            | 12.24 | 66.96  | 32.88                         | 0.62       | -44.26 | 204.97 | 0.69              | 0.78                                                                 | 0.09            | 0.51 | 0.97  | 12.06                           | 0.21       | -26.06 | 40.60 |
|            |             | 0.3                        | 20.54           | 31.31                                                              | 0.09            | 13.45 | 66.96  | 54.52                         | 0.74       | -34.50 | 226.02 | 0.67              | 0.80                                                                 | 0.09            | 0.55 | 0.98  | 19.27                           | 0.22       | -18.21 | 45.73 |
|            |             | 0.4                        | 19.23           | 34.06                                                              | 0.10            | 14.57 | 72.61  | 80.52                         | 0.89       | -24.23 | 277.53 | 0.65              | 0.83                                                                 | 0.09            | 0.60 | 1.00  | 27.35                           | 0.22       | -6.88  | 55.00 |
|            | 0.12        | 0.01                       | 24.81           | 25.03                                                              | 0.08            | 12.41 | 46.60  | 2.73                          | 0.46       | -49.98 | 87.80  | 0.74              | 0.75                                                                 | 0.08            | 0.50 | 0.95  | 0.55                            | 0.21       | -32.06 | 29.09 |
|            |             | 0.1                        | 22.19           | 26.07                                                              | 0.08            | 12.00 | 51.12  | 19.37                         | 0.56       | -45.94 | 130.37 | 0.69              | 0.76                                                                 | 0.08            | 0.50 | 0.95  | 8.78                            | 0.22       | -28.15 | 36.92 |
|            |             | 0.2                        | 19.37           | 26.99                                                              | 0.09            | 11.97 | 66.96  | 41.27                         | 0.68       | -38.19 | 245.75 | 0.64              | 0.77                                                                 | 0.09            | 0.50 | 0.97  | 19.13                           | 0.24       | -22.55 | 51.32 |
|            |             | 0.3                        | 16.79           | 28.00                                                              | 0.09            | 12.24 | 60.26  | 71.08                         | 0.84       | -27.11 | 258.90 | 0.59              | 0.79                                                                 | 0.09            | 0.52 | 0.97  | 31.78                           | 0.26       | -12.20 | 63.89 |

| parameters |             |                            | True Median PFS | Summary Statistics from simulations of the estimated KM Median PFS |                 |       |        | Relative (%) bias: Median PFS |            |        |        | True 12-month PFS | Summary Statistics from simulations of the estimated KM 12 month PFS |                 |      |       | Relative (%) bias: 12 Month PFS |            |        |       |
|------------|-------------|----------------------------|-----------------|--------------------------------------------------------------------|-----------------|-------|--------|-------------------------------|------------|--------|--------|-------------------|----------------------------------------------------------------------|-----------------|------|-------|---------------------------------|------------|--------|-------|
| N          | $\lambda_2$ | % discontinued prior to PD |                 | median                                                             | Mean Std. error | min   | max    | mean                          | Std. error | min    | max    |                   | median                                                               | Mean Std. error | min  | max   | mean                            | Std. error | min    | max   |
|            |             | 0.4                        | 14.57           | 29.66                                                              | 0.10            | 13.12 | 72.61  | 108.65                        | 1.09       | -9.99  | 398.37 | 0.55              | 0.81                                                                 | 0.09            | 0.55 | 1.00  | 47.18                           | 0.29       | 0.72   | 83.42 |
| 60         | 0.03        | 0.01                       | 25.10           | 25.37                                                              | 0.06            | 14.43 | 43.95  | 2.15                          | 0.38       | -42.53 | 75.07  | 0.74              | 0.75                                                                 | 0.06            | 0.53 | 0.92  | 0.50                            | 0.17       | -27.98 | 23.71 |
|            |             | 0.1                        | 25.10           | 27.42                                                              | 0.07            | 14.83 | 47.49  | 10.58                         | 0.43       | -40.93 | 89.18  | 0.74              | 0.76                                                                 | 0.05            | 0.56 | 0.92  | 3.32                            | 0.17       | -23.88 | 24.28 |
|            |             | 0.2                        | 25.10           | 30.46                                                              | 0.07            | 16.19 | 51.96  | 22.75                         | 0.49       | -35.51 | 106.96 | 0.73              | 0.79                                                                 | 0.05            | 0.59 | 0.95  | 6.86                            | 0.16       | -20.09 | 29.30 |
|            |             | 0.3                        | 25.10           | 34.36                                                              | 0.07            | 19.56 | 58.97  | 38.57                         | 0.56       | -22.08 | 134.88 | 0.73              | 0.81                                                                 | 0.05            | 0.63 | 0.95  | 10.47                           | 0.16       | -14.33 | 29.83 |
|            |             | 0.4                        | 25.10           | 39.26                                                              | 0.07            | 21.77 | 74.52  | 59.24                         | 0.65       | -13.30 | 196.83 | 0.73              | 0.83                                                                 | 0.05            | 0.67 | 0.98  | 14.27                           | 0.15       | -8.51  | 34.81 |
|            | 0.06        | 0.01                       | 24.94           | 25.20                                                              | 0.06            | 13.99 | 43.95  | 2.25                          | 0.38       | -43.91 | 76.24  | 0.74              | 0.75                                                                 | 0.08            | 0.53 | 0.92  | 0.70                            | 0.17       | -27.77 | 23.98 |
|            |             | 0.1                        | 22.19           | 26.66                                                              | 0.07            | 14.83 | 45.21  | 21.78                         | 0.47       | -33.17 | 103.76 | 0.72              | 0.76                                                                 | 0.08            | 0.56 | 0.92  | 5.80                            | 0.17       | -21.94 | 27.87 |
|            |             | 0.2                        | 21.96           | 28.58                                                              | 0.07            | 15.91 | 47.56  | 31.80                         | 0.52       | -27.55 | 116.59 | 0.69              | 0.78                                                                 | 0.09            | 0.57 | 0.95  | 12.26                           | 0.18       | -17.45 | 36.88 |
|            |             | 0.3                        | 20.54           | 30.86                                                              | 0.07            | 17.99 | 52.95  | 52.14                         | 0.61       | -12.41 | 157.78 | 0.67              | 0.80                                                                 | 0.09            | 0.61 | 0.95  | 19.31                           | 0.18       | -8.94  | 41.68 |
|            |             | 0.4                        | 19.23           | 33.64                                                              | 0.08            | 19.34 | 61.02  | 77.94                         | 0.72       | 0.54   | 217.26 | 0.65              | 0.82                                                                 | 0.09            | 0.63 | 0.98  | 27.15                           | 0.18       | -1.90  | 51.84 |
|            | 0.12        | 0.01                       | 24.81           | 25.05                                                              | 0.07            | 13.99 | 43.95  | 2.38                          | 0.38       | -43.62 | 77.13  | 0.74              | 0.75                                                                 | 0.08            | 0.53 | 0.92  | 0.92                            | 0.17       | -27.53 | 24.37 |
|            |             | 0.1                        | 22.19           | 25.88                                                              | 0.07            | 13.99 | 44.78  | 18.27                         | 0.47       | -36.96 | 101.81 | 0.69              | 0.75                                                                 | 0.08            | 0.55 | 0.92  | 8.87                            | 0.18       | -19.86 | 32.44 |
| 0.2        |             | 19.37                      | 26.90           | 0.07                                                               | 13.62           | 46.21 | 40.75  | 0.56                          | -29.66     | 138.57 | 0.64   | 0.77              | 0.09                                                                 | 0.55            | 0.95 | 19.37 | 0.20                            | -14.75     | 47.27  |       |
| 0.3        |             | 16.79                      | 28.02           | 0.08                                                               | 15.83           | 50.77 | 69.16  | 0.70                          | -5.72      | 202.39 | 0.59   | 0.78              | 0.09                                                                 | 0.58            | 0.95 | 31.81 | 0.22                            | -2.53      | 59.18  |       |
| 0.4        |             | 14.57                      | 29.40           | 0.08                                                               | 16.21           | 58.63 | 104.83 | 0.87                          | 11.27      | 302.36 | 0.55   | 0.80              | 0.09                                                                 | 0.59            | 0.98 | 46.91 | 0.24                            | 9.13       | 79.06  |       |
| 1000       | 0.03        | 0.01                       | 25.10           | 25.32                                                              | 0.02            | 21.87 | 28.61  | 1.01                          | 0.09       | -12.89 | 13.95  | 0.74              | 0.74                                                                 | 0.01            | 0.69 | 0.79  | 0.33                            | 0.04       | -6.59  | 6.25  |
|            |             | 0.1                        | 25.10           | 27.56                                                              | 0.02            | 23.65 | 31.64  | 9.88                          | 0.10       | -5.79  | 26.04  | 0.74              | 0.76                                                                 | 0.01            | 0.72 | 0.80  | 3.38                            | 0.04       | -2.64  | 9.07  |
|            |             | 0.2                        | 25.10           | 30.66                                                              | 0.02            | 26.62 | 34.87  | 22.13                         | 0.11       | 6.02   | 38.89  | 0.73              | 0.79                                                                 | 0.01            | 0.74 | 0.83  | 6.91                            | 0.04       | 1.06   | 12.66 |
|            |             | 0.3                        | 25.10           | 34.57                                                              | 0.02            | 30.20 | 39.43  | 37.77                         | 0.13       | 20.30  | 57.04  | 0.73              | 0.81                                                                 | 0.01            | 0.76 | 0.85  | 10.57                           | 0.04       | 4.43   | 15.79 |
|            |             | 0.4                        | 25.10           | 39.84                                                              | 0.02            | 34.26 | 45.56  | 58.59                         | 0.15       | 36.46  | 81.50  | 0.73              | 0.83                                                                 | 0.01            | 0.79 | 0.87  | 14.39                           | 0.04       | 8.65   | 18.92 |
|            | 0.06        | 0.01                       | 24.94           | 25.25                                                              | 0.02            | 21.86 | 28.57  | 1.40                          | 0.09       | -12.36 | 14.55  | 0.74              | 0.74                                                                 | 0.08            | 0.69 | 0.79  | 0.57                            | 0.04       | -6.39  | 6.55  |
|            |             | 0.1                        | 22.19           | 26.77                                                              | 0.02            | 23.33 | 30.51  | 20.76                         | 0.11       | 5.13   | 37.50  | 0.72              | 0.76                                                                 | 0.08            | 0.71 | 0.80  | 5.87                            | 0.04       | -0.55  | 11.80 |
|            |             | 0.2                        | 21.96           | 28.71                                                              | 0.02            | 24.80 | 32.62  | 30.89                         | 0.12       | 12.94  | 48.56  | 0.69              | 0.78                                                                 | 0.09            | 0.73 | 0.82  | 12.33                           | 0.04       | 5.63   | 18.58 |
|            |             | 0.3                        | 20.54           | 31.09                                                              | 0.02            | 27.21 | 35.55  | 51.27                         | 0.14       | 32.46  | 73.06  | 0.67              | 0.80                                                                 | 0.09            | 0.75 | 0.84  | 19.43                           | 0.04       | 12.29  | 25.43 |
|            |             | 0.4                        | 19.23           | 33.92                                                              | 0.02            | 29.08 | 38.96  | 76.58                         | 0.17       | 51.18  | 102.57 | 0.65              | 0.82                                                                 | 0.09            | 0.78 | 0.86  | 27.31                           | 0.04       | 20.37  | 32.89 |
|            | 0.12        | 0.01                       | 24.81           | 25.19                                                              | 0.02            | 21.86 | 28.47  | 1.63                          | 0.09       | -11.92 | 14.72  | 0.74              | 0.74                                                                 | 0.08            | 0.69 | 0.79  | 0.83                            | 0.04       | -6.18  | 6.84  |
|            |             | 0.1                        | 22.19           | 25.97                                                              | 0.02            | 22.69 | 29.80  | 17.19                         | 0.11       | 2.25   | 34.30  | 0.69              | 0.75                                                                 | 0.08            | 0.71 | 0.80  | 8.94                            | 0.04       | 2.03   | 15.31 |
|            |             | 0.2                        | 19.37           | 26.99                                                              | 0.02            | 23.11 | 30.92  | 39.45                         | 0.13       | 19.30  | 59.64  | 0.64              | 0.77                                                                 | 0.09            | 0.72 | 0.81  | 19.46                           | 0.05       | 11.63  | 26.48 |
|            |             | 0.3                        | 16.79           | 28.13                                                              | 0.02            | 23.86 | 32.57  | 67.67                         | 0.17       | 42.12  | 93.97  | 0.59              | 0.78                                                                 | 0.09            | 0.73 | 0.83  | 31.97                           | 0.05       | 22.80  | 39.19 |
|            |             | 0.4                        | 14.57           | 29.50                                                              | 0.02            | 24.81 | 34.08  | 102.56                        | 0.21       | 70.26  | 133.88 | 0.55              | 0.80                                                                 | 0.09            | 0.75 | 0.84  | 47.11                           | 0.06       | 37.29  | 54.55 |

**Table 2. Distribution of the relative (%) bias of the 12-month progression-free survival estimation (in months) of newly diagnosed WM patients by scenario. We assumed that the hazard rate of progression for those who remained on therapy is 0.06 (to simulate R/R WM patients), and that the administrative censoring started from 48 months after initiation of therapy. Number of simulated data: B=2000.**

| parameters |             |                            | True Median PFS | Summary Statistics from simulations of the estimated KM Median PFS |               |       |       | Relative (%) bias: Median PFS |          |        |        | True 12-month h PFS | Summary Statistics from simulations of the estimated KM 12 month PFS |                 |      |       | Relative (%) bias: 12 Month PFS |          |        |        |
|------------|-------------|----------------------------|-----------------|--------------------------------------------------------------------|---------------|-------|-------|-------------------------------|----------|--------|--------|---------------------|----------------------------------------------------------------------|-----------------|------|-------|---------------------------------|----------|--------|--------|
| N          | $\lambda_2$ | % discontinued prior to PD |                 | median                                                             | Mean Std. err | min   | max   | mean                          | Std. err | min    | max    |                     | median                                                               | Mean Std. error | min  | max   | mean                            | Std. err | min    | max    |
| 25         | 0.06        | 0.01                       | 13.55           | 13.65                                                              | 0.10          | 5.75  | 29.28 | 3.35                          | 0.58     | -57.55 | 116.03 | 0.55                | 0.56                                                                 | 0.10            | 0.24 | 0.84  | 0.49                            | 0.40     | -56.23 | 53.19  |
|            |             | 0.1                        | 13.55           | 14.70                                                              | 0.10          | 5.75  | 31.32 | 11.03                         | 0.63     | -57.55 | 131.10 | 0.54                | 0.58                                                                 | 0.10            | 0.22 | 0.88  | 5.78                            | 0.41     | -59.80 | 60.82  |
|            |             | 0.2                        | 13.55           | 16.25                                                              | 0.11          | 6.38  | 38.84 | 23.36                         | 0.71     | -52.90 | 186.61 | 0.54                | 0.62                                                                 | 0.10            | 0.26 | 0.91  | 13.94                           | 0.41     | -51.72 | 68.54  |
|            |             | 0.3                        | 13.55           | 18.35                                                              | 0.11          | 6.65  | 48.47 | 40.49                         | 0.83     | -50.90 | 257.63 | 0.53                | 0.66                                                                 | 0.10            | 0.31 | 0.96  | 22.76                           | 0.40     | -41.32 | 79.24  |
|            |             | 0.4                        | 13.55           | 20.40                                                              | 0.12          | 7.29  | 52.92 | 56.23                         | 0.94     | -46.18 | 290.50 | 0.53                | 0.69                                                                 | 0.10            | 0.33 | 0.96  | 29.65                           | 0.39     | -37.13 | 81.15  |
|            | 0.12        | 0.01                       | 13.47           | 13.65                                                              | 0.10          | 5.75  | 29.28 | 3.98                          | 0.58     | -57.28 | 117.36 | 0.55                | 0.56                                                                 | 0.10            | 0.24 | 0.84  | 0.95                            | 0.40     | -56.03 | 53.89  |
|            |             | 0.1                        | 12.09           | 14.23                                                              | 0.10          | 5.17  | 31.32 | 20.92                         | 0.69     | -57.23 | 158.96 | 0.52                | 0.57                                                                 | 0.10            | 0.22 | 0.88  | 9.42                            | 0.44     | -58.12 | 68.56  |
|            |             | 0.2                        | 11.98           | 15.21                                                              | 0.11          | 5.75  | 32.42 | 30.68                         | 0.76     | -51.97 | 170.62 | 0.49                | 0.60                                                                 | 0.10            | 0.18 | 0.90  | 21.84                           | 0.48     | -62.51 | 84.78  |
|            |             | 0.3                        | 11.27           | 16.43                                                              | 0.12          | 5.98  | 43.20 | 51.02                         | 0.91     | -46.92 | 283.30 | 0.46                | 0.63                                                                 | 0.11            | 0.25 | 0.96  | 36.56                           | 0.51     | -44.75 | 108.48 |
|            |             | 0.4                        | 10.62           | 17.64                                                              | 0.12          | 6.61  | 48.47 | 70.93                         | 1.03     | -37.75 | 356.51 | 0.43                | 0.65                                                                 | 0.11            | 0.27 | 0.96  | 51.62                           | 0.54     | -36.94 | 122.88 |
|            | 0.24        | 0.01                       | 13.41           | 13.65                                                              | 0.10          | 5.75  | 29.28 | 4.47                          | 0.58     | -57.08 | 118.38 | 0.54                | 0.56                                                                 | 0.10            | 0.24 | 0.84  | 1.30                            | 0.41     | -55.88 | 54.42  |
|            |             | 0.1                        | 12.09           | 13.76                                                              | 0.10          | 5.17  | 29.83 | 17.29                         | 0.67     | -57.23 | 146.67 | 0.50                | 0.57                                                                 | 0.10            | 0.22 | 0.88  | 11.91                           | 0.46     | -56.55 | 74.90  |
| 0.2        |             | 10.68                      | 14.52           | 0.11                                                               | 4.65          | 32.42 | 40.13 | 0.86                          | -56.45   | 203.41 | 0.45   | 0.58                | 0.11                                                                 | 0.16            | 0.90 | 27.30 | 0.54                            | -65.56   | 99.23  |        |
| 0.3        |             | 9.40                       | 14.83           | 0.12                                                               | 5.93          | 36.10 | 63.61 | 1.01                          | -36.86   | 284.21 | 0.40   | 0.60                | 0.11                                                                 | 0.14            | 0.96 | 46.89 | 0.64                            | -64.67   | 137.23 |        |
| 0.4        |             | 8.29                       | 15.44           | 0.13                                                               | 5.93          | 43.20 | 93.47 | 1.25                          | -28.40   | 421.38 | 0.35   | 0.61                | 0.12                                                                 | 0.16            | 0.96 | 71.01 | 0.75                            | -55.43   | 169.70 |        |
| 40         | 0.06        | 0.01                       | 13.55           | 13.52                                                              | 0.08          | 7.21  | 24.30 | 1.42                          | 0.42     | -46.83 | 79.30  | 0.55                | 0.55                                                                 | 0.08            | 0.33 | 0.80  | 0.12                            | 0.31     | -40.73 | 45.89  |
|            |             | 0.1                        | 13.55           | 14.70                                                              | 0.08          | 7.52  | 26.49 | 10.40                         | 0.47     | -44.50 | 95.45  | 0.54                | 0.58                                                                 | 0.08            | 0.32 | 0.82  | 6.52                            | 0.31     | -40.99 | 50.26  |
|            |             | 0.2                        | 13.55           | 16.16                                                              | 0.08          | 7.12  | 34.14 | 21.07                         | 0.54     | -47.47 | 151.90 | 0.54                | 0.61                                                                 | 0.08            | 0.38 | 0.84  | 13.54                           | 0.31     | -29.78 | 55.53  |
|            |             | 0.3                        | 13.55           | 18.10                                                              | 0.09          | 7.73  | 34.14 | 35.55                         | 0.61     | -42.99 | 151.90 | 0.53                | 0.65                                                                 | 0.08            | 0.40 | 0.87  | 21.39                           | 0.31     | -24.52 | 62.14  |
|            |             | 0.4                        | 13.55           | 20.65                                                              | 0.09          | 9.61  | 43.55 | 54.85                         | 0.72     | -29.07 | 221.34 | 0.53                | 0.69                                                                 | 0.08            | 0.44 | 0.91  | 29.97                           | 0.30     | -17.51 | 72.26  |
|            | 0.12        | 0.01                       | 13.47           | 13.52                                                              | 0.08          | 7.21  | 24.30 | 2.05                          | 0.43     | -46.51 | 80.40  | 0.55                | 0.55                                                                 | 0.08            | 0.33 | 0.80  | 0.57                            | 0.32     | -40.46 | 46.56  |
|            |             | 0.1                        | 12.09           | 14.29                                                              | 0.08          | 7.37  | 26.06 | 19.97                         | 0.52     | -39.05 | 115.51 | 0.52                | 0.57                                                                 | 0.08            | 0.31 | 0.81  | 9.83                            | 0.33     | -40.41 | 56.69  |
|            |             | 0.2                        | 11.98           | 15.20                                                              | 0.09          | 7.12  | 32.96 | 28.93                         | 0.57     | -40.56 | 175.11 | 0.49                | 0.60                                                                 | 0.08            | 0.35 | 0.83  | 21.35                           | 0.36     | -28.55 | 70.38  |
|            |             | 0.3                        | 11.27           | 16.35                                                              | 0.09          | 7.12  | 32.96 | 47.53                         | 0.67     | -36.83 | 192.42 | 0.46                | 0.62                                                                 | 0.08            | 0.36 | 0.86  | 35.37                           | 0.39     | -21.22 | 86.69  |
|            |             | 0.4                        | 10.62           | 17.73                                                              | 0.10          | 8.29  | 34.14 | 69.84                         | 0.80     | -21.95 | 221.55 | 0.43                | 0.66                                                                 | 0.09            | 0.36 | 0.91  | 52.24                           | 0.42     | -15.54 | 110.83 |
|            | 0.24        | 0.01                       | 13.41           | 13.52                                                              | 0.08          | 7.21  | 24.30 | 2.53                          | 0.43     | -46.26 | 81.25  | 0.54                | 0.55                                                                 | 0.08            | 0.33 | 0.80  | 0.92                            | 0.32     | -40.25 | 47.07  |
|            |             | 0.1                        | 12.09           | 13.99                                                              | 0.08          | 7.00  | 26.06 | 17.54                         | 0.51     | -42.14 | 115.51 | 0.50                | 0.56                                                                 | 0.08            | 0.29 | 0.81  | 11.90                           | 0.35     | -41.73 | 62.19  |
| 0.2        |             | 10.68                      | 14.36           | 0.09                                                               | 6.94          | 32.96 | 36.22 | 0.62                          | -35.06   | 208.45 | 0.45   | 0.57                | 0.08                                                                 | 0.29            | 0.83 | 26.72 | 0.41                            | -36.23   | 83.42  |        |
| 0.3        |             | 9.40                       | 14.81           | 0.09                                                               | 7.07          | 30.13 | 60.93 | 0.75                          | -24.73   | 220.66 | 0.40   | 0.59                | 0.09                                                                 | 0.28            | 0.85 | 46.13 | 0.48                            | -29.51   | 111.65 |        |
| 0.4        |             | 8.29                       | 15.60           | 0.10                                                               | 7.07          | 32.96 | 91.92 | 0.94                          | -14.64   | 297.76 | 0.35   | 0.61                | 0.09                                                                 | 0.29            | 0.90 | 71.68 | 0.59                            | -19.49   | 153.18 |        |
| 60         | 0.06        | 0.01                       | 13.55           | 13.68                                                              | 0.06          | 8.21  | 22.98 | 1.95                          | 0.35     | -39.39 | 69.53  | 0.55                | 0.55                                                                 | 0.06            | 0.35 | 0.75  | 1.11                            | 0.26     | -36.17 | 36.78  |
|            |             | 0.1                        | 13.55           | 14.65                                                              | 0.07          | 8.41  | 24.75 | 9.45                          | 0.39     | -37.91 | 82.60  | 0.54                | 0.58                                                                 | 0.06            | 0.36 | 0.77  | 6.58                            | 0.26     | -34.37 | 42.31  |

| parameters |             |                            | True Median PFS | Summary Statistics from simulations of the estimated KM Median PFS |               |       |       | Relative (%) bias: Median PFS |          |        |        | True 12-month PFS | Summary Statistics from simulations of the estimated KM 12 month PFS |                 |      |      | Relative (%) bias: 12 Month PFS |          |        |       |
|------------|-------------|----------------------------|-----------------|--------------------------------------------------------------------|---------------|-------|-------|-------------------------------|----------|--------|--------|-------------------|----------------------------------------------------------------------|-----------------|------|------|---------------------------------|----------|--------|-------|
| N          | $\lambda_2$ | % discontinued prior to PD |                 | median                                                             | Mean Std. err | min   | max   | mean                          | Std. err | min    | max    |                   | median                                                               | Mean Std. error | min  | max  | mean                            | Std. err | min    | max   |
|            | 0.12        | 0.2                        | 13.55           | 16.13                                                              | 0.07          | 9.10  | 26.98 | 20.30                         | 0.45     | -32.89 | 99.06  | 0.54              | 0.61                                                                 | 0.06            | 0.37 | 0.80 | 13.75                           | 0.26     | -31.60 | 48.95 |
|            |             | 0.3                        | 13.55           | 17.98                                                              | 0.07          | 10.78 | 30.48 | 34.17                         | 0.51     | -20.45 | 124.93 | 0.53              | 0.65                                                                 | 0.06            | 0.45 | 0.82 | 21.36                           | 0.26     | -15.90 | 54.04 |
|            |             | 0.4                        | 13.55           | 20.25                                                              | 0.07          | 11.88 | 34.47 | 52.06                         | 0.59     | -12.32 | 154.37 | 0.53              | 0.69                                                                 | 0.06            | 0.49 | 0.86 | 29.70                           | 0.25     | -6.73  | 61.63 |
|            | 0.24        | 0.01                       | 13.47           | 13.60                                                              | 0.06          | 7.99  | 22.98 | 2.04                          | 0.35     | -40.65 | 70.58  | 0.55              | 0.55                                                                 | 0.06            | 0.35 | 0.75 | 1.29                            | 0.26     | -35.88 | 37.40 |
|            |             | 0.1                        | 12.09           | 14.27                                                              | 0.07          | 8.41  | 23.61 | 19.36                         | 0.43     | -30.43 | 95.18  | 0.52              | 0.57                                                                 | 0.07            | 0.35 | 0.77 | 9.94                            | 0.28     | -33.04 | 48.15 |
|            |             | 0.2                        | 11.98           | 15.16                                                              | 0.07          | 8.95  | 24.78 | 27.91                         | 0.48     | -25.25 | 106.85 | 0.49              | 0.60                                                                 | 0.07            | 0.34 | 0.80 | 21.59                           | 0.30     | -31.25 | 63.00 |
|            |             | 0.3                        | 11.27           | 16.15                                                              | 0.07          | 9.82  | 27.47 | 45.36                         | 0.55     | -12.86 | 143.78 | 0.46              | 0.62                                                                 | 0.07            | 0.41 | 0.82 | 35.27                           | 0.33     | -11.22 | 77.71 |
|            | 0.24        | 0.4                        | 10.62           | 17.41                                                              | 0.08          | 10.67 | 31.22 | 67.39                         | 0.65     | 0.49   | 194.06 | 0.43              | 0.65                                                                 | 0.07            | 0.44 | 0.85 | 51.83                           | 0.34     | 1.48   | 97.52 |
|            |             | 0.01                       | 13.41           | 13.52                                                              | 0.07          | 7.99  | 22.98 | 2.18                          | 0.35     | -40.37 | 71.38  | 0.54              | 0.55                                                                 | 0.06            | 0.35 | 0.75 | 1.33                            | 0.26     | -35.66 | 37.62 |
|            |             | 0.1                        | 12.09           | 13.89                                                              | 0.07          | 7.99  | 23.39 | 16.35                         | 0.43     | -33.90 | 93.39  | 0.50              | 0.56                                                                 | 0.07            | 0.34 | 0.76 | 12.01                           | 0.30     | -32.40 | 52.32 |
|            |             | 0.2                        | 10.68           | 14.29                                                              | 0.07          | 7.81  | 23.61 | 35.53                         | 0.51     | -26.88 | 120.95 | 0.45              | 0.57                                                                 | 0.07            | 0.32 | 0.79 | 26.97                           | 0.34     | -29.85 | 73.82 |
|            | 1000        | 0.06                       | 0.3             | 13.55                                                              | 18.08         | 0.02  | 15.94 | 20.63                         | 33.44    | 0.12   | 17.65  | 52.22             | 0.53                                                                 | 0.65            | 0.02 | 0.60 | 0.71                            | 21.58    | 0.06   | 11.99 |
| 0.4        |             |                            | 13.55           | 20.58                                                              | 0.02          | 17.82 | 23.52 | 51.87                         | 0.14     | 31.51  | 73.53  | 0.53              | 0.69                                                                 | 0.02            | 0.64 | 0.75 | 29.97                           | 0.06     | 20.55  | 41.51 |
| 0.01       |             |                            | 13.47           | 13.62                                                              | 0.02          | 11.93 | 15.28 | 1.25                          | 0.09     | -11.45 | 13.47  | 0.55              | 0.55                                                                 | 0.02            | 0.50 | 0.61 | 1.01                            | 0.06     | -8.78  | 10.88 |
| 0.1        |             |                            | 12.09           | 14.32                                                              | 0.02          | 12.63 | 16.21 | 18.47                         | 0.10     | 4.43   | 34.06  | 0.52              | 0.57                                                                 | 0.02            | 0.52 | 0.63 | 10.04                           | 0.07     | -0.04  | 21.12 |
| 0.12       |             | 0.2                        | 11.98           | 15.20                                                              | 0.02          | 13.29 | 17.07 | 27.09                         | 0.11     | 10.94  | 42.49  | 0.49              | 0.60                                                                 | 0.02            | 0.54 | 0.66 | 21.74                           | 0.07     | 10.30  | 34.10 |
|            |             | 0.3                        | 11.27           | 16.31                                                              | 0.02          | 14.26 | 18.48 | 44.66                         | 0.13     | 26.53  | 63.96  | 0.46              | 0.62                                                                 | 0.02            | 0.57 | 0.69 | 35.57                           | 0.08     | 23.71  | 50.36 |
|            |             | 0.4                        | 10.62           | 17.62                                                              | 0.02          | 15.24 | 20.12 | 66.20                         | 0.15     | 43.57  | 89.53  | 0.43              | 0.65                                                                 | 0.02            | 0.60 | 0.72 | 52.21                           | 0.09     | 39.94  | 68.38 |
|            |             | 0.01                       | 13.41           | 13.58                                                              | 0.02          | 11.93 | 15.23 | 1.45                          | 0.09     | -11.03 | 13.62  | 0.54              | 0.55                                                                 | 0.02            | 0.50 | 0.60 | 1.17                            | 0.06     | -8.59  | 11.10 |
| 0.24       |             | 0.1                        | 12.09           | 13.91                                                              | 0.02          | 12.30 | 15.85 | 15.20                         | 0.10     | 1.66   | 31.08  | 0.50              | 0.56                                                                 | 0.02            | 0.51 | 0.62 | 12.11                           | 0.07     | 1.29   | 23.93 |
|            |             | 0.2                        | 10.68           | 14.35                                                              | 0.02          | 12.35 | 16.39 | 34.44                         | 0.12     | 15.58  | 53.42  | 0.45              | 0.57                                                                 | 0.02            | 0.51 | 0.64 | 27.11                           | 0.08     | 12.91  | 41.12 |
|            |             | 0.3                        | 9.40            | 14.83                                                              | 0.02          | 12.79 | 17.20 | 58.12                         | 0.15     | 36.15  | 83.06  | 0.40              | 0.59                                                                 | 0.02            | 0.53 | 0.66 | 46.24                           | 0.10     | 30.73  | 64.42 |
|            |             | 0.4                        | 8.29            | 15.44                                                              | 0.02          | 13.27 | 17.63 | 86.53                         | 0.19     | 60.11  | 112.77 | 0.35              | 0.61                                                                 | 0.02            | 0.55 | 0.69 | 71.50                           | 0.12     | 54.13  | 93.79 |

**Table 3. Distribution of the relative (%) bias of the KM estimation of the median and 12-month progression-free survival (in months) of newly diagnosed MM patients by scenario. We assumed that no patient progresses within the first six months of induction treatment for patients who undergone ASCT, that the hazard rate of progression for those not eligible for transplantation is 0.036, and that the administrative censoring started from 200 months after induction treatment. Number of simulated data: B=2000.**

| Parameters |             |        | True Median PFS | Summary Statistics from simulations of the estimated KM Median PFS |               |       |       | Relative (%) bias: Median PFS |          |        |        | True 12-month PFS | Summary Statistics from simulations of the estimated KM 12 month PFS |               |      |      | Relative (%) bias: 12 Month PFS |         |        |       |
|------------|-------------|--------|-----------------|--------------------------------------------------------------------|---------------|-------|-------|-------------------------------|----------|--------|--------|-------------------|----------------------------------------------------------------------|---------------|------|------|---------------------------------|---------|--------|-------|
| N          | $\lambda_2$ | % ASCT |                 | median                                                             | Mean Std. err | min   | max   | mean                          | Std. err | min    | max    |                   | median                                                               | Mean Std. err | min  | max  | mean                            | Std.err | min    | max   |
| 25         | 0.036       | 0.01   | 21.30           | 20.96                                                              | 0.10          | 9.37  | 51.88 | 2.42                          | 0.61     | -56.01 | 143.58 | 0.70              | 0.68                                                                 | 0.09          | 0.40 | 0.96 | -0.31                           | 0.29    | -42.76 | 37.39 |
|            |             | 0.1    | 21.68           | 21.38                                                              | 0.10          | 6.88  | 47.89 | 0.92                          | 0.61     | -68.29 | 120.90 | 0.71              | 0.70                                                                 | 0.09          | 0.35 | 0.96 | -1.24                           | 0.30    | -50.05 | 35.01 |
|            |             | 0.2    | 22.10           | 22.61                                                              | 0.11          | 8.88  | 58.94 | 5.62                          | 0.67     | -59.81 | 166.67 | 0.72              | 0.72                                                                 | 0.10          | 0.36 | 1.00 | -0.62                           | 0.30    | -50.25 | 39.03 |
|            |             | 0.3    | 22.52           | 22.08                                                              | 0.12          | 8.37  | 64.19 | 2.05                          | 0.69     | -62.82 | 185.09 | 0.73              | 0.73                                                                 | 0.10          | 0.37 | 1.00 | -0.80                           | 0.32    | -49.60 | 36.97 |
|            |             | 0.4    | 22.92           | 22.24                                                              | 0.13          | 7.48  | 50.44 | 0.89                          | 0.68     | -67.37 | 120.04 | 0.74              | 0.75                                                                 | 0.11          | 0.33 | 1.00 | -0.82                           | 0.33    | -55.05 | 34.97 |
|            | 0.018       | 0.01   | 21.40           | 21.22                                                              | 0.10          | 7.75  | 48.60 | 2.43                          | 0.61     | -63.77 | 127.11 | 0.70              | 0.68                                                                 | 0.09          | 0.36 | 1.00 | -0.30                           | 0.30    | -48.55 | 42.92 |
|            |             | 0.1    | 22.77           | 21.58                                                              | 0.10          | 7.26  | 48.89 | -2.95                         | 0.59     | -68.11 | 114.67 | 0.72              | 0.70                                                                 | 0.09          | 0.36 | 1.00 | -1.23                           | 0.30    | -49.24 | 39.33 |
|            |             | 0.2    | 24.45           | 22.40                                                              | 0.11          | 8.21  | 56.82 | -4.71                         | 0.60     | -66.43 | 132.37 | 0.74              | 0.72                                                                 | 0.10          | 0.37 | 1.00 | -3.27                           | 0.30    | -49.38 | 35.56 |
|            |             | 0.3    | 26.30           | 21.68                                                              | 0.12          | 7.78  | 57.40 | -13.70                        | 0.59     | -70.43 | 118.23 | 0.76              | 0.73                                                                 | 0.10          | 0.25 | 1.00 | -4.57                           | 0.32    | -67.18 | 31.98 |
|            |             | 0.4    | 28.34           | 22.24                                                              | 0.13          | 7.48  | 50.44 | -18.39                        | 0.55     | -73.60 | 77.98  | 0.78              | 0.75                                                                 | 0.11          | 0.33 | 1.00 | -5.50                           | 0.32    | -57.17 | 28.58 |
|            | 0.012       | 0.01   | 21.44           | 21.15                                                              | 0.10          | 7.78  | 49.08 | 1.00                          | 0.59     | -63.73 | 128.90 | 0.70              | 0.72                                                                 | 0.09          | 0.32 | 0.92 | -0.29                           | 0.29    | -54.29 | 31.43 |
|            |             | 0.1    | 23.26           | 21.30                                                              | 0.10          | 6.96  | 44.73 | -5.52                         | 0.57     | -70.07 | 92.35  | 0.72              | 0.70                                                                 | 0.09          | 0.39 | 0.96 | -2.30                           | 0.29    | -45.31 | 33.15 |
|            |             | 0.2    | 25.61           | 22.47                                                              | 0.11          | 6.07  | 48.12 | -9.87                         | 0.56     | -76.28 | 87.90  | 0.74              | 0.72                                                                 | 0.10          | 0.37 | 0.96 | -4.21                           | 0.30    | -49.92 | 29.00 |
|            |             | 0.3    | 28.39           | 22.05                                                              | 0.12          | 7.30  | 68.75 | -19.50                        | 0.54     | -74.29 | 142.16 | 0.77              | 0.73                                                                 | 0.10          | 0.25 | 1.00 | -5.56                           | 0.31    | -67.24 | 30.29 |
|            |             | 0.4    | 31.68           | 22.30                                                              | 0.13          | 8.08  | 65.08 | -26.44                        | 0.52     | -74.49 | 105.41 | 0.79              | 0.74                                                                 | 0.11          | 0.31 | 1.00 | -7.31                           | 0.32    | -60.38 | 26.45 |
|            | 0.009       | 0.01   | 21.46           | 21.32                                                              | 0.10          | 7.46  | 45.69 | 1.38                          | 0.57     | -65.24 | 112.90 | 0.70              | 0.68                                                                 | 0.09          | 0.32 | 0.96 | -0.46                           | 0.29    | -54.30 | 37.10 |
|            |             | 0.1    | 23.53           | 21.17                                                              | 0.10          | 7.81  | 50.61 | -6.95                         | 0.57     | -66.80 | 115.10 | 0.72              | 0.70                                                                 | 0.09          | 0.27 | 1.00 | -2.46                           | 0.30    | -62.60 | 38.37 |
|            |             | 0.2    | 26.31           | 22.31                                                              | 0.11          | 8.81  | 48.66 | -12.19                        | 0.55     | -66.52 | 84.94  | 0.75              | 0.72                                                                 | 0.10          | 0.32 | 1.00 | -4.47                           | 0.30    | -57.56 | 33.76 |
|            |             | 0.3    | 29.75           | 22.06                                                              | 0.12          | 8.00  | 64.07 | -23.66                        | 0.50     | -73.12 | 115.35 | 0.77              | 0.73                                                                 | 0.10          | 0.31 | 1.00 | -6.11                           | 0.31    | -59.32 | 29.43 |
|            |             | 0.4    | 34.05           | 22.04                                                              | 0.13          | 8.22  | 55.62 | -32.28                        | 0.47     | -75.86 | 63.33  | 0.80              | 0.74                                                                 | 0.11          | 0.30 | 1.00 | -8.44                           | 0.31    | -61.79 | 25.38 |
| 40         | 0.036       | 0.01   | 21.30           | 21.34                                                              | 0.08          | 10.24 | 42.31 | 2.31                          | 0.47     | -51.93 | 98.69  | 0.70              | 0.70                                                                 | 0.07          | 0.45 | 0.95 | -0.05                           | 0.23    | -35.60 | 35.96 |
|            |             | 0.1    | 21.68           | 22.03                                                              | 0.08          | 8.77  | 43.49 | 3.28                          | 0.49     | -59.57 | 100.58 | 0.71              | 0.71                                                                 | 0.07          | 0.43 | 0.95 | -0.07                           | 0.24    | -39.80 | 33.69 |
|            |             | 0.2    | 22.10           | 22.05                                                              | 0.09          | 10.21 | 46.73 | 2.70                          | 0.52     | -53.80 | 111.43 | 0.72              | 0.71                                                                 | 0.08          | 0.44 | 0.97 | -0.84                           | 0.24    | -38.16 | 34.68 |
|            |             | 0.3    | 22.52           | 22.37                                                              | 0.09          | 8.38  | 45.87 | 1.58                          | 0.53     | -62.80 | 103.74 | 0.73              | 0.73                                                                 | 0.08          | 0.41 | 0.96 | -1.05                           | 0.25    | -43.27 | 32.08 |
|            |             | 0.4    | 22.92           | 22.91                                                              | 0.10          | 9.58  | 50.35 | 1.64                          | 0.58     | -58.21 | 119.66 | 0.74              | 0.74                                                                 | 0.09          | 0.41 | 0.97 | -0.91                           | 0.27    | -45.29 | 30.32 |
|            | 0.018       | 0.01   | 21.40           | 21.15                                                              | 0.08          | 9.43  | 40.60 | 0.09                          | 0.44     | -55.93 | 89.73  | 0.70              | 0.70                                                                 | 0.07          | 0.43 | 0.93 | -0.61                           | 0.24    | -39.26 | 32.20 |
|            |             | 0.1    | 22.77           | 22.04                                                              | 0.08          | 9.50  | 47.28 | -1.72                         | 0.49     | -58.29 | 107.60 | 0.72              | 0.70                                                                 | 0.07          | 0.42 | 0.97 | -1.60                           | 0.24    | -40.94 | 35.47 |
|            |             | 0.2    | 24.45           | 22.15                                                              | 0.09          | 9.36  | 49.06 | -7.87                         | 0.47     | -61.71 | 100.67 | 0.74              | 0.72                                                                 | 0.08          | 0.42 | 1.00 | -3.21                           | 0.24    | -43.05 | 35.56 |
|            |             | 0.3    | 26.30           | 22.50                                                              | 0.09          | 10.03 | 43.78 | -12.95                        | 0.45     | -61.86 | 66.45  | 0.76              | 0.73                                                                 | 0.08          | 0.37 | 0.95 | -4.88                           | 0.24    | -50.64 | 25.38 |
|            |             | 0.4    | 28.34           | 22.91                                                              | 0.10          | 9.58  | 50.35 | -17.79                        | 0.47     | -66.20 | 77.67  | 0.78              | 0.74                                                                 | 0.09          | 0.41 | 0.97 | -5.59                           | 0.26    | -47.87 | 24.16 |
|            | 0.012       | 0.01   | 21.44           | 21.50                                                              | 0.08          | 10.00 | 38.12 | 1.57                          | 0.46     | -53.35 | 77.80  | 0.70              | 0.70                                                                 | 0.07          | 0.43 | 0.93 | 0.04                            | 0.24    | -39.29 | 32.14 |
|            |             | 0.1    | 23.26           | 22.03                                                              | 0.08          | 10.16 | 41.95 | -3.69                         | 0.47     | -56.29 | 80.39  | 0.72              | 0.70                                                                 | 0.07          | 0.45 | 0.98 | -2.29                           | 0.24    | -37.10 | 35.23 |



| Parameters |             |        | True Median PFS | Summary Statistics from simulations of the estimated KM Median PFS |               |       |       | Relative (%) bias: Median PFS |          |        |        | True 12-month PFS | Summary Statistics from simulations of the estimated KM 12 month PFS |               |      |       | Relative (%) bias: 12 Month PFS |         |        |        |        |
|------------|-------------|--------|-----------------|--------------------------------------------------------------------|---------------|-------|-------|-------------------------------|----------|--------|--------|-------------------|----------------------------------------------------------------------|---------------|------|-------|---------------------------------|---------|--------|--------|--------|
| N          | $\lambda_2$ | % ASCT |                 | median                                                             | Mean Std. err | min   | max   | mean                          | Std. err | min    | max    |                   | median                                                               | Mean Std. err | min  | max   | mean                            | Std.err | min    | max    |        |
| 60         | 0.009       | 0.2    | 25.61           | 22.28                                                              | 0.09          | 9.64  | 41.48 | -11.63                        | 0.44     | -62.35 | 61.97  | 0.74              | 0.72                                                                 | 0.08          | 0.46 | 0.98  | -3.90                           | 0.24    | -38.85 | 31.01  |        |
|            |             | 0.3    | 28.39           | 22.33                                                              | 0.09          | 9.38  | 46.90 | -19.52                        | 0.43     | -66.95 | 65.20  | 0.77              | 0.72                                                                 | 0.08          | 0.44 | 0.98  | -5.99                           | 0.24    | -43.23 | 27.04  |        |
|            |             | 0.4    | 31.68           | 22.62                                                              | 0.10          | 10.06 | 50.17 | -26.89                        | 0.40     | -68.25 | 58.36  | 0.79              | 0.73                                                                 | 0.09          | 0.39 | 0.98  | -7.84                           | 0.24    | -50.08 | 23.29  |        |
|            |             | 0.01   | 21.46           | 21.31                                                              | 0.08          | 11.20 | 46.66 | 0.48                          | 0.45     | -47.83 | 117.41 | 0.70              | 0.70                                                                 | 0.07          | 0.48 | 0.95  | -0.53                           | 0.23    | -32.16 | 35.68  |        |
|            |             | 0.1    | 23.53           | 21.84                                                              | 0.08          | 10.83 | 46.97 | -5.54                         | 0.44     | -53.97 | 99.62  | 0.72              | 0.70                                                                 | 0.07          | 0.45 | 0.92  | -2.39                           | 0.23    | -37.32 | 27.20  |        |
|            |             | 0.2    | 26.31           | 22.08                                                              | 0.09          | 9.97  | 44.68 | -14.68                        | 0.43     | -62.10 | 69.82  | 0.75              | 0.72                                                                 | 0.08          | 0.46 | 0.94  | -4.35                           | 0.23    | -39.07 | 25.40  |        |
|            | 60          | 0.036  | 0.3             | 29.75                                                              | 22.45         | 0.09  | 10.02 | 46.81                         | -22.88   | 0.41   | -66.34 | 57.34             | 0.77                                                                 | 0.73          | 0.08 | 0.45  | 0.96                            | -6.17   | 0.24   | -41.72 | 24.81  |
|            |             |        | 0.4             | 34.05                                                              | 22.80         | 0.10  | 10.21 | 59.64                         | -31.25   | 0.38   | -70.02 | 75.15             | 0.80                                                                 | 0.73          | 0.09 | 0.45  | 1.00                            | -7.90   | 0.24   | -43.18 | 25.38  |
|            |             |        | 0.01            | 21.30                                                              | 21.32         | 0.07  | 11.95 | 40.50                         | 1.45     | 0.39   | -43.91 | 90.18             | 0.70                                                                 | 0.70          | 0.06 | 0.49  | 0.90                            | 0.35    | 0.19   | -29.52 | 28.56  |
|            |             |        | 0.1             | 21.68                                                              | 21.89         | 0.07  | 11.69 | 37.27                         | 2.47     | 0.41   | -46.06 | 71.90             | 0.71                                                                 | 0.71          | 0.06 | 0.45  | 0.88                            | -0.08   | 0.20   | -36.48 | 23.93  |
|            |             |        | 0.2             | 22.10                                                              | 21.86         | 0.07  | 11.64 | 46.31                         | 0.38     | 0.41   | -47.31 | 109.52            | 0.72                                                                 | 0.71          | 0.06 | 0.48  | 0.96                            | -0.90   | 0.20   | -33.21 | 33.80  |
|            |             |        | 0.3             | 22.52                                                              | 22.34         | 0.08  | 9.35  | 38.92                         | 0.23     | 0.42   | -58.46 | 72.85             | 0.73                                                                 | 0.73          | 0.07 | 0.47  | 0.92                            | -0.95   | 0.21   | -35.07 | 25.34  |
| 60         |             | 0.018  | 0.4             | 22.92                                                              | 22.52         | 0.08  | 9.87  | 43.08                         | 0.54     | 0.47   | -56.94 | 87.94             | 0.74                                                                 | 0.73          | 0.07 | 0.45  | 0.94                            | -1.33   | 0.22   | -39.03 | 26.63  |
|            |             |        | 0.01            | 21.40                                                              | 21.14         | 0.07  | 11.02 | 36.03                         | -0.12    | 0.38   | -48.50 | 68.37             | 0.70                                                                 | 0.70          | 0.06 | 0.46  | 0.90                            | 0.01    | 0.19   | -34.49 | 28.50  |
|            |             |        | 0.1             | 22.77                                                              | 21.69         | 0.07  | 10.68 | 38.46                         | -3.48    | 0.37   | -53.11 | 68.87             | 0.72                                                                 | 0.71          | 0.06 | 0.42  | 0.93                            | -1.76   | 0.19   | -41.69 | 29.07  |
|            |             |        | 0.2             | 24.45                                                              | 21.76         | 0.07  | 11.22 | 38.58                         | -9.50    | 0.37   | -54.12 | 57.79             | 0.74                                                                 | 0.71          | 0.06 | 0.49  | 0.90                            | -3.21   | 0.19   | -34.20 | 22.42  |
|            |             |        | 0.3             | 26.30                                                              | 22.24         | 0.08  | 10.81 | 40.96                         | -14.23   | 0.38   | -58.89 | 55.72             | 0.76                                                                 | 0.72          | 0.07 | 0.46  | 0.92                            | -4.71   | 0.20   | -38.91 | 21.21  |
|            |             |        | 0.4             | 28.34                                                              | 22.52         | 0.08  | 9.87  | 43.08                         | -18.68   | 0.38   | -65.17 | 52.02             | 0.78                                                                 | 0.73          | 0.07 | 0.45  | 0.94                            | -5.99   | 0.21   | -41.92 | 20.65  |
|            | 60          | 0.012  | 0.01            | 21.44                                                              | 21.20         | 0.07  | 11.37 | 37.07                         | 0.17     | 0.38   | -46.98 | 72.92             | 0.70                                                                 | 0.70          | 0.06 | 0.48  | 0.88                            | -0.39   | 0.19   | -32.03 | 26.01  |
|            |             |        | 0.1             | 23.26                                                              | 21.74         | 0.07  | 11.15 | 37.47                         | -5.15    | 0.37   | -52.04 | 61.13             | 0.72                                                                 | 0.71          | 0.06 | 0.49  | 0.90                            | -2.00   | 0.19   | -31.80 | 24.13  |
|            |             |        | 0.2             | 25.61                                                              | 21.88         | 0.07  | 10.58 | 39.51                         | -13.47   | 0.35   | -58.69 | 54.28             | 0.74                                                                 | 0.72          | 0.06 | 0.48  | 0.92                            | -3.82   | 0.19   | -36.01 | 24.24  |
|            |             |        | 0.3             | 28.39                                                              | 22.29         | 0.08  | 12.03 | 42.95                         | -20.36   | 0.34   | -57.63 | 51.26             | 0.77                                                                 | 0.73          | 0.07 | 0.50  | 0.93                            | -5.76   | 0.19   | -34.53 | 20.56  |
|            |             |        | 0.4             | 31.68                                                              | 22.51         | 0.08  | 10.74 | 47.29                         | -27.72   | 0.34   | -66.09 | 49.27             | 0.79                                                                 | 0.73          | 0.07 | 0.45  | 0.96                            | -7.70   | 0.21   | -43.44 | 20.79  |
|            |             |        | 0.009           | 0.01                                                               | 21.46         | 21.20 | 0.07  | 11.83                         | 36.44    | -0.36  | 0.37   | -44.87            | 69.76                                                                | 0.70          | 0.70 | 0.06  | 0.49                            | 0.86    | -0.19  | 0.19   | -29.72 |
| 100        |             | 0.036  | 0.1             | 23.53                                                              | 21.80         | 0.07  | 11.43 | 38.63                         | -6.08    | 0.37   | -51.44 | 64.16             | 0.72                                                                 | 0.71          | 0.06 | 0.47  | 0.89                            | -2.23   | 0.19   | -34.74 | 23.65  |
|            |             |        | 0.2             | 26.31                                                              | 21.88         | 0.07  | 11.89 | 41.33                         | -15.79   | 0.34   | -54.80 | 57.09             | 0.75                                                                 | 0.72          | 0.06 | 0.50  | 0.89                            | -4.80   | 0.19   | -33.79 | 18.43  |
|            |             |        | 0.3             | 29.75                                                              | 22.10         | 0.08  | 9.76  | 42.79                         | -24.43   | 0.33   | -67.18 | 43.81             | 0.77                                                                 | 0.72          | 0.07 | 0.44  | 0.90                            | -6.73   | 0.20   | -43.02 | 17.11  |
|            |             |        | 0.4             | 34.05                                                              | 22.61         | 0.08  | 11.47 | 43.31                         | -32.11   | 0.32   | -66.31 | 27.18             | 0.80                                                                 | 0.74          | 0.07 | 0.46  | 0.96                            | -8.20   | 0.20   | -42.80 | 19.77  |
|            |             |        | 0.01            | 21.30                                                              | 21.40         | 0.05  | 13.96 | 31.38                         | 0.74     | 0.29   | -34.46 | 47.34             | 0.70                                                                 | 0.70          | 0.57 | 0.84  | 0.19                            | 0.15    | -18.94 | 20.09  | 0.70   |
|            |             |        | 0.1             | 21.68                                                              | 21.53         | 0.05  | 14.59 | 34.95                         | 0.04     | 0.29   | -32.70 | 61.20             | 0.71                                                                 | 0.71          | 0.55 | 0.84  | -0.47                           | 0.15    | -22.15 | 18.30  | 0.71   |
|            | 0.018       | 0.2    | 22.10           | 21.79                                                              | 0.06          | 13.52 | 34.47 | -0.84                         | 0.32     | -38.81 | 55.95  | 0.71              | 0.71                                                                 | 0.55          | 0.88 | -0.86 | 0.15                            | -24.20  | 21.96  | 0.71   |        |
|            |             | 0.3    | 22.52           | 22.22                                                              | 0.06          | 12.95 | 35.31 | -0.34                         | 0.33     | -42.49 | 56.81  | 0.72              | 0.72                                                                 | 0.51          | 0.87 | -1.02 | 0.16                            | -30.05  | 19.41  | 0.72   |        |
|            |             | 0.4    | 22.92           | 22.56                                                              | 0.07          | 12.60 | 38.84 | -1.12                         | 0.34     | -45.03 | 69.43  | 0.73              | 0.73                                                                 | 0.53          | 0.89 | -1.31 | 0.17                            | -28.49  | 19.90  | 0.73   |        |
|            |             | 0.01   | 21.40           | 21.22                                                              | 0.05          | 14.00 | 31.30 | -0.18                         | 0.28     | -34.60 | 46.26  | 0.70              | 0.70                                                                 | 0.05          | 0.56 | 0.87  | -0.14                           | 0.15    | -20.54 | 24.21  |        |
|            |             | 0.1    | 22.77           | 21.55                                                              | 0.05          | 12.54 | 36.08 | -4.47                         | 0.28     | -44.95 | 58.43  | 0.72              | 0.71                                                                 | 0.05          | 0.52 | 0.87  | -1.50                           | 0.15    | -27.52 | 21.40  |        |
|            |             | 0.2    | 24.45           | 21.89                                                              | 0.06          | 14.46 | 35.67 | -9.81                         | 0.28     | -40.84 | 45.90  | 0.74              | 0.71                                                                 | 0.05          | 0.54 | 0.90  | -3.13                           | 0.15    | -26.80 | 22.06  |        |
| 100        | 0.018       | 0.3    | 26.30           | 22.14                                                              | 0.06          | 13.59 | 36.94 | -14.85                        | 0.29     | -48.33 | 40.43  | 0.76              | 0.72                                                                 | 0.05          | 0.55 | 0.88  | -4.76                           | 0.16    | -27.41 | 15.93  |        |
|            |             | 0.4    | 28.34           | 22.56                                                              | 0.07          | 12.60 | 38.84 | -20.02                        | 0.28     | -55.54 | 37.04  | 0.78              | 0.73                                                                 | 0.06          | 0.53 | 0.89  | -5.97                           | 0.16    | -31.86 | 14.23  |        |

| Parameters |             |        | True Median PFS | Summary Statistics from simulations of the estimated KM Median PFS |               |       |       | Relative (%) bias: Median PFS |          |        |        | True 12-month PFS | Summary Statistics from simulations of the estimated KM 12 month PFS |               |      |      | Relative (%) bias: 12 Month PFS |         |        |        |      |
|------------|-------------|--------|-----------------|--------------------------------------------------------------------|---------------|-------|-------|-------------------------------|----------|--------|--------|-------------------|----------------------------------------------------------------------|---------------|------|------|---------------------------------|---------|--------|--------|------|
| N          | $\lambda_2$ | % ASCT |                 | median                                                             | Mean Std. err | min   | max   | mean                          | Std. err | min    | max    |                   | median                                                               | Mean Std. err | min  | max  | mean                            | Std.err | min    | max    |      |
| 1000       | 0.012       | 0.01   | 21.44           | 21.18                                                              | 0.05          | 12.48 | 31.29 | -0.19                         | 0.29     | -41.81 | 45.95  | 0.70              | 0.70                                                                 | 0.05          | 0.51 | 0.85 | -0.31                           | 0.15    | -27.70 | 21.27  |      |
|            |             | 0.1    | 23.26           | 21.43                                                              | 0.05          | 12.42 | 32.91 | -7.39                         | 0.28     | -46.60 | 41.51  | 0.72              | 0.71                                                                 | 0.05          | 0.51 | 0.84 | -2.37                           | 0.15    | -29.31 | 16.26  |      |
|            |             | 0.2    | 25.61           | 21.93                                                              | 0.06          | 13.36 | 34.34 | -13.74                        | 0.27     | -47.82 | 34.08  | 0.74              | 0.71                                                                 | 0.05          | 0.55 | 0.88 | -4.08                           | 0.15    | -26.04 | 17.71  |      |
|            |             | 0.3    | 28.39           | 22.37                                                              | 0.06          | 13.85 | 35.27 | -20.72                        | 0.26     | -51.23 | 24.21  | 0.77              | 0.73                                                                 | 0.05          | 0.53 | 0.90 | -5.59                           | 0.15    | -30.42 | 17.21  |      |
|            |             | 0.4    | 31.68           | 22.47                                                              | 0.07          | 13.34 | 39.30 | -28.21                        | 0.25     | -57.89 | 24.05  | 0.79              | 0.73                                                                 | 0.06          | 0.53 | 0.90 | -7.83                           | 0.16    | -32.63 | 13.82  |      |
|            | 0.009       | 0.01   | 21.46           | 21.24                                                              | 0.05          | 11.76 | 30.90 | -0.41                         | 0.30     | -45.20 | 43.97  | 0.70              | 0.70                                                                 | 0.05          | 0.49 | 0.85 | -0.23                           | 0.15    | -30.59 | 21.28  |      |
|            |             | 0.1    | 23.53           | 21.54                                                              | 0.05          | 13.31 | 32.90 | -7.72                         | 0.28     | -43.42 | 39.80  | 0.72              | 0.71                                                                 | 0.05          | 0.55 | 0.85 | -2.44                           | 0.15    | -23.59 | 17.31  |      |
|            |             | 0.2    | 26.31           | 22.01                                                              | 0.06          | 13.13 | 35.71 | -15.94                        | 0.27     | -50.10 | 35.72  | 0.75              | 0.72                                                                 | 0.05          | 0.53 | 0.90 | -4.57                           | 0.15    | -28.46 | 20.01  |      |
|            |             | 0.3    | 29.75           | 22.25                                                              | 0.06          | 13.78 | 33.64 | -24.91                        | 0.25     | -53.69 | 13.07  | 0.77              | 0.72                                                                 | 0.05          | 0.54 | 0.88 | -6.60                           | 0.15    | -30.74 | 13.76  |      |
|            |             | 0.4    | 34.05           | 22.44                                                              | 0.07          | 13.71 | 37.31 | -33.36                        | 0.24     | -59.74 | 9.57   | 0.80              | 0.73                                                                 | 0.06          | 0.53 | 0.91 | -8.24                           | 0.16    | -34.10 | 13.60  |      |
|            | 1000        | 0.036  | 0.01            | 21.30                                                              | 21.35         | 0.02  | 18.61 | 25.15                         | 0.27     | 0.09   | -12.63 | 18.07             | 0.70                                                                 | 0.70          | 0.01 | 0.65 | 0.75                            | 0.09    | 0.05   | -6.65  | 6.78 |
|            |             |        | 0.1             | 21.68                                                              | 21.58         | 0.02  | 18.41 | 24.78                         | -0.44    | 0.10   | -15.10 | 14.29             | 0.71                                                                 | 0.71          | 0.02 | 0.65 | 0.76                            | -0.40   | 0.05   | -8.71  | 6.65 |
|            |             |        | 0.2             | 22.10                                                              | 21.91         | 0.02  | 18.46 | 25.11                         | -0.82    | 0.10   | -16.46 | 13.62             | 0.72                                                                 | 0.71          | 0.02 | 0.66 | 0.77                            | -0.71   | 0.05   | -8.13  | 7.24 |
|            |             |        | 0.3             | 22.52                                                              | 22.21         | 0.02  | 19.26 | 25.61                         | -1.23    | 0.11   | -14.47 | 13.73             | 0.73                                                                 | 0.72          | 0.02 | 0.67 | 0.78                            | -1.07   | 0.05   | -8.59  | 6.40 |
|            |             |        | 0.4             | 22.92                                                              | 22.60         | 0.02  | 18.28 | 26.66                         | -1.26    | 0.11   | -20.26 | 16.30             | 0.74                                                                 | 0.73          | 0.02 | 0.66 | 0.80                            | -1.26   | 0.05   | -10.38 | 7.31 |
|            |             | 0.018  | 0.01            | 21.40                                                              | 21.28         | 0.02  | 18.46 | 24.23                         | -0.49    | 0.09   | -13.75 | 13.24             | 0.70                                                                 | 0.70          | 0.01 | 0.65 | 0.75                            | -0.16   | 0.05   | -7.35  | 7.50 |
| 0.1        |             |        | 22.77           | 21.56                                                              | 0.02          | 18.25 | 24.87 | -5.19                         | 0.09     | -19.88 | 9.20   | 0.72              | 0.71                                                                 | 0.02          | 0.66 | 0.75 | -1.66                           | 0.05    | -8.65  | 4.47   |      |
| 0.2        |             |        | 24.45           | 21.90                                                              | 0.02          | 18.75 | 25.10 | -10.31                        | 0.09     | -23.33 | 2.66   | 0.74              | 0.71                                                                 | 0.02          | 0.65 | 0.77 | -3.20                           | 0.05    | -11.55 | 4.20   |      |
| 0.3        |             |        | 26.30           | 22.22                                                              | 0.02          | 18.52 | 25.93 | -15.44                        | 0.09     | -29.58 | -1.42  | 0.76              | 0.72                                                                 | 0.02          | 0.67 | 0.78 | -4.66                           | 0.05    | -11.93 | 2.89   |      |
| 0.4        |             |        | 28.34           | 22.60                                                              | 0.02          | 18.28 | 26.66 | -20.14                        | 0.09     | -35.50 | -5.93  | 0.78              | 0.73                                                                 | 0.02          | 0.66 | 0.80 | -5.93                           | 0.05    | -14.61 | 2.24   |      |
| 0.012      |             | 0.01   | 21.44           | 21.32                                                              | 0.02          | 18.25 | 24.42 | -0.53                         | 0.09     | -14.89 | 13.89  | 0.70              | 0.70                                                                 | 0.01          | 0.65 | 0.75 | -0.16                           | 0.05    | -6.94  | 6.73   |      |
|            |             | 0.1    | 23.26           | 21.56                                                              | 0.02          | 18.58 | 25.46 | -7.16                         | 0.09     | -20.09 | 9.49   | 0.72              | 0.71                                                                 | 0.02          | 0.65 | 0.76 | -2.21                           | 0.05    | -10.29 | 4.97   |      |
|            |             | 0.2    | 25.61           | 21.86                                                              | 0.02          | 19.17 | 26.24 | -14.46                        | 0.09     | -25.13 | 2.46   | 0.74              | 0.71                                                                 | 0.02          | 0.66 | 0.77 | -4.04                           | 0.05    | -11.02 | 2.92   |      |
|            |             | 0.3    | 28.39           | 22.26                                                              | 0.02          | 18.90 | 26.07 | -21.63                        | 0.08     | -33.45 | -8.16  | 0.77              | 0.72                                                                 | 0.02          | 0.66 | 0.77 | -5.89                           | 0.05    | -13.60 | 0.78   |      |
|            |             | 0.4    | 31.68           | 22.55                                                              | 0.02          | 19.22 | 26.58 | -28.74                        | 0.08     | -39.32 | -16.12 | 0.79              | 0.73                                                                 | 0.02          | 0.67 | 0.79 | -7.49                           | 0.05    | -14.66 | -0.67  |      |
| 0.009      |             | 0.01   | 21.46           | 21.22                                                              | 0.02          | 17.80 | 24.90 | -0.97                         | 0.09     | -17.08 | 16.03  | 0.70              | 0.70                                                                 | 0.01          | 0.65 | 0.75 | -0.33                           | 0.05    | -7.70  | 6.58   |      |
|            |             | 0.1    | 23.53           | 21.54                                                              | 0.02          | 18.73 | 25.02 | -8.37                         | 0.09     | -20.38 | 6.34   | 0.72              | 0.71                                                                 | 0.02          | 0.66 | 0.76 | -2.38                           | 0.05    | -9.17  | 5.16   |      |
|            |             | 0.2    | 26.31           | 21.90                                                              | 0.02          | 18.93 | 25.19 | -16.67                        | 0.08     | -28.05 | -4.28  | 0.75              | 0.72                                                                 | 0.02          | 0.66 | 0.77 | -4.45                           | 0.05    | -11.86 | 2.47   |      |
|            |             | 0.3    | 29.75           | 22.23                                                              | 0.02          | 18.71 | 25.72 | -25.24                        | 0.08     | -37.11 | -13.57 | 0.77              | 0.72                                                                 | 0.02          | 0.67 | 0.78 | -6.50                           | 0.05    | -13.78 | 0.52   |      |
|            |             | 0.4    | 34.05           | 22.52                                                              | 0.02          | 19.03 | 26.17 | -33.71                        | 0.08     | -44.11 | -23.14 | 0.80              | 0.73                                                                 | 0.02          | 0.67 | 0.80 | -8.30                           | 0.05    | -15.90 | 0.55   |      |

**Table 4. Distribution of the relative (%) bias of the KM estimation of the median and 12-month progression-free survival (in months) of newly diagnosed MM patients by scenario. We assumed that no patient progresses within the first six months of induction treatment for patients who undergone ASCT, that the hazard rate of progression for those not eligible for transplantation is 0.108, and that the administrative censoring started from 200 months after induction treatment. Number of simulated data: B=2000.**

| parameters |             |        | True Median PFS | Summary Statistics from simulations of the estimated KM Median PFS |              |      |       | Relative (%) bias: Median PFS |         |        |        | True 12 month PFS | Summary Statistics from simulations of the estimated KM 12 month PFS |              |      |      | Relative (%) bias: 12 Month PFS |         |         |        |
|------------|-------------|--------|-----------------|--------------------------------------------------------------------|--------------|------|-------|-------------------------------|---------|--------|--------|-------------------|----------------------------------------------------------------------|--------------|------|------|---------------------------------|---------|---------|--------|
| N          | $\lambda_2$ | % ASCT |                 | median                                                             | Mean Std.err | min  | max   | mean                          | Std.err | min    | max    |                   | median                                                               | Mean Std.err | min  | max  | mean                            | Std.err | min     | max    |
| 25         | 0.108       | 0.01   | 8.47            | 8.32                                                               | 0.10         | 4.46 | 18.63 | 1.61                          | 0.51    | -47.38 | 119.95 | 0.34              | 0.32                                                                 | 0.09         | 0.08 | 0.64 | -0.91                           | 0.62    | -76.57  | 87.45  |
|            |             | 0.1    | 8.91            | 8.60                                                               | 0.10         | 3.80 | 17.30 | -1.08                         | 0.47    | -57.37 | 94.24  | 0.36              | 0.36                                                                 | 0.10         | 0.05 | 0.74 | -2.05                           | 0.63    | -87.21  | 108.07 |
|            |             | 0.2    | 9.37            | 9.07                                                               | 0.11         | 4.83 | 20.98 | -0.13                         | 0.51    | -48.39 | 123.94 | 0.38              | 0.37                                                                 | 0.11         | 0.05 | 0.74 | -3.39                           | 0.67    | -85.86  | 95.33  |
|            |             | 0.3    | 9.81            | 9.64                                                               | 0.12         | 5.11 | 25.52 | 1.53                          | 0.54    | -47.89 | 160.20 | 0.39              | 0.39                                                                 | 0.12         | 0.00 | 0.77 | -2.91                           | 0.69    | -100.00 | 94.00  |
|            |             | 0.4    | 10.23           | 9.88                                                               | 0.13         | 5.35 | 21.16 | 0.45                          | 0.54    | -47.74 | 106.87 | 0.41              | 0.39                                                                 | 0.13         | 0.00 | 0.85 | -4.28                           | 0.71    | -100.00 | 105.63 |
|            | 0.054       | 0.01   | 8.49            | 8.41                                                               | 0.10         | 3.92 | 17.53 | 1.78                          | 0.51    | -53.85 | 106.56 | 0.34              | 0.32                                                                 | 0.09         | 0.08 | 0.64 | -0.64                           | 0.62    | -76.70  | 86.37  |
|            |             | 0.1    | 9.15            | 8.62                                                               | 0.10         | 4.46 | 17.63 | -3.29                         | 0.47    | -51.32 | 92.59  | 0.38              | 0.36                                                                 | 0.10         | 0.09 | 0.75 | -6.30                           | 0.59    | -76.64  | 97.49  |
|            |             | 0.2    | 9.96            | 9.05                                                               | 0.11         | 5.12 | 20.27 | -5.94                         | 0.47    | -48.63 | 103.47 | 0.42              | 0.37                                                                 | 0.11         | 0.05 | 0.72 | -12.25                          | 0.60    | -87.00  | 72.88  |
|            |             | 0.3    | 10.85           | 9.57                                                               | 0.12         | 4.68 | 24.99 | -8.87                         | 0.49    | -56.90 | 130.27 | 0.45              | 0.38                                                                 | 0.12         | 0.00 | 0.78 | -15.94                          | 0.59    | -100.00 | 72.03  |
|            |             | 0.4    | 11.82           | 9.88                                                               | 0.13         | 5.35 | 21.16 | -13.04                        | 0.47    | -54.76 | 79.09  | 0.49              | 0.39                                                                 | 0.13         | 0.00 | 0.85 | -19.81                          | 0.60    | -100.00 | 72.24  |
|            | 0.036       | 0.01   | 8.50            | 8.38                                                               | 0.10         | 3.93 | 17.69 | 0.66                          | 0.49    | -53.80 | 108.25 | 0.34              | 0.32                                                                 | 0.09         | 0.08 | 0.76 | -1.98                           | 0.62    | -76.76  | 120.74 |
|            |             | 0.1    | 9.26            | 8.60                                                               | 0.10         | 4.59 | 16.24 | -4.74                         | 0.46    | -50.39 | 75.50  | 0.39              | 0.36                                                                 | 0.10         | 0.04 | 0.70 | -8.60                           | 0.58    | -88.37  | 80.79  |
|            |             | 0.2    | 10.25           | 9.03                                                               | 0.11         | 4.70 | 17.37 | -9.43                         | 0.44    | -54.12 | 69.58  | 0.43              | 0.37                                                                 | 0.11         | 0.05 | 0.72 | -16.15                          | 0.57    | -87.41  | 67.44  |
|            |             | 0.3    | 11.42           | 9.65                                                               | 0.12         | 4.76 | 24.25 | -13.04                        | 0.46    | -58.35 | 112.41 | 0.48              | 0.38                                                                 | 0.12         | 0.00 | 0.82 | -19.84                          | 0.56    | -100.00 | 71.78  |
|            |             | 0.4    | 12.80           | 9.88                                                               | 0.13         | 5.25 | 23.93 | -19.39                        | 0.44    | -58.99 | 86.90  | 0.53              | 0.40                                                                 | 0.13         | 0.00 | 0.81 | -24.23                          | 0.55    | -100.00 | 53.34  |
|            | 0.027       | 0.01   | 8.50            | 8.44                                                               | 0.10         | 3.82 | 16.56 | 1.02                          | 0.48    | -55.05 | 94.89  | 0.34              | 0.32                                                                 | 0.09         | 0.08 | 0.68 | -1.42                           | 0.59    | -76.79  | 97.27  |
|            |             | 0.1    | 9.31            | 8.53                                                               | 0.10         | 4.15 | 18.20 | -5.62                         | 0.46    | -55.42 | 95.48  | 0.39              | 0.35                                                                 | 0.10         | 0.09 | 0.66 | -11.03                          | 0.57    | -77.17  | 69.47  |
|            |             | 0.2    | 10.41           | 9.01                                                               | 0.11         | 4.68 | 18.17 | -10.58                        | 0.44    | -55.06 | 74.50  | 0.44              | 0.37                                                                 | 0.11         | 0.05 | 0.69 | -17.90                          | 0.56    | -88.28  | 56.54  |
|            |             | 0.3    | 11.78           | 9.63                                                               | 0.12         | 5.14 | 22.69 | -16.20                        | 0.43    | -56.34 | 92.58  | 0.49              | 0.38                                                                 | 0.12         | 0.00 | 0.72 | -23.78                          | 0.55    | -100.00 | 46.71  |
|            |             | 0.4    | 13.50           | 9.87                                                               | 0.13         | 5.56 | 24.70 | -24.11                        | 0.41    | -58.79 | 83.01  | 0.54              | 0.39                                                                 | 0.13         | 0.00 | 0.89 | -27.36                          | 0.53    | -100.00 | 63.89  |
| 40         | 0.108       | 0.01   | 8.47            | 8.45                                                               | 0.08         | 4.75 | 15.44 | 1.51                          | 0.39    | -43.96 | 82.31  | 0.34              | 0.35                                                                 | 0.07         | 0.13 | 0.63 | -0.29                           | 0.51    | -63.39  | 83.05  |
|            |             | 0.1    | 8.91            | 8.72                                                               | 0.08         | 4.99 | 15.83 | -0.51                         | 0.39    | -43.95 | 77.75  | 0.36              | 0.35                                                                 | 0.08         | 0.12 | 0.62 | -1.66                           | 0.50    | -67.59  | 74.52  |
|            |             | 0.2    | 9.37            | 9.13                                                               | 0.09         | 5.44 | 16.91 | -0.19                         | 0.39    | -41.98 | 80.50  | 0.38              | 0.37                                                                 | 0.08         | 0.10 | 0.65 | -2.13                           | 0.52    | -73.10  | 72.48  |
|            |             | 0.3    | 9.81            | 9.50                                                               | 0.10         | 5.54 | 16.90 | -1.32                         | 0.40    | -43.52 | 72.34  | 0.39              | 0.38                                                                 | 0.09         | 0.12 | 0.69 | -3.68                           | 0.53    | -69.12  | 75.37  |
|            |             | 0.4    | 10.23           | 9.87                                                               | 0.10         | 5.90 | 19.74 | -1.55                         | 0.42    | -42.37 | 92.96  | 0.41              | 0.40                                                                 | 0.10         | 0.06 | 0.77 | -4.11                           | 0.55    | -86.51  | 85.23  |
|            | 0.054       | 0.01   | 8.49            | 8.38                                                               | 0.08         | 4.48 | 14.87 | -0.18                         | 0.37    | -47.25 | 75.15  | 0.34              | 0.33                                                                 | 0.07         | 0.10 | 0.65 | -2.33                           | 0.48    | -70.88  | 89.28  |
|            |             | 0.1    | 9.15            | 8.74                                                               | 0.08         | 4.98 | 17.09 | -3.12                         | 0.39    | -45.63 | 86.73  | 0.38              | 0.35                                                                 | 0.08         | 0.09 | 0.65 | -6.59                           | 0.48    | -75.93  | 72.25  |
|            |             | 0.2    | 9.96            | 9.16                                                               | 0.09         | 5.43 | 17.75 | -6.80                         | 0.37    | -45.46 | 78.11  | 0.42              | 0.37                                                                 | 0.08         | 0.10 | 0.65 | -12.44                          | 0.48    | -75.47  | 55.30  |
|            |             | 0.3    | 10.85           | 9.56                                                               | 0.09         | 5.30 | 16.62 | -10.59                        | 0.36    | -51.15 | 53.15  | 0.45              | 0.38                                                                 | 0.09         | 0.08 | 0.72 | -16.12                          | 0.46    | -82.05  | 57.29  |
|            |             | 0.4    | 11.82           | 9.87                                                               | 0.10         | 5.90 | 19.74 | -14.77                        | 0.36    | -50.11 | 67.04  | 0.49              | 0.40                                                                 | 0.10         | 0.06 | 0.77 | -19.67                          | 0.46    | -88.68  | 55.14  |
|            | 0.036       | 0.01   | 8.50            | 8.50                                                               | 0.08         | 4.67 | 14.04 | 1.14                          | 0.39    | -45.06 | 65.26  | 0.34              | 0.35                                                                 | 0.07         | 0.03 | 0.58 | -0.55                           | 0.49    | -92.74  | 67.01  |
|            |             | 0.1    | 9.26            | 8.72                                                               | 0.08         | 4.75 | 15.32 | -4.17                         | 0.38    | -48.65 | 65.49  | 0.39              | 0.35                                                                 | 0.08         | 0.12 | 0.60 | -8.42                           | 0.46    | -69.55  | 55.59  |
|            |             | 0.2    | 10.25           | 9.19                                                               | 0.09         | 5.66 | 15.44 | -9.18                         | 0.35    | -44.71 | 50.66  | 0.43              | 0.37                                                                 | 0.08         | 0.10 | 0.65 | -15.20                          | 0.44    | -75.99  | 50.00  |
|            |             | 0.3    | 11.42           | 9.49                                                               | 0.09         | 5.70 | 18.68 | -15.21                        | 0.35    | -50.05 | 63.59  | 0.48              | 0.38                                                                 | 0.09         | 0.08 | 0.67 | -20.80                          | 0.43    | -82.46  | 39.05  |
|            |             | 0.4    | 12.80           | 9.86                                                               | 0.10         | 5.90 | 20.84 | -21.28                        | 0.34    | -53.94 | 62.78  | 0.53              | 0.39                                                                 | 0.10         | 0.00 | 0.71 | -25.09                          | 0.44    | -100.00 | 34.54  |
|            | 0.027       | 0.01   | 8.50            | 8.44                                                               | 0.08         | 5.07 | 16.89 | 0.26                          | 0.38    | -40.40 | 98.68  | 0.34              | 0.35                                                                 | 0.07         | 0.08 | 0.58 | -1.25                           | 0.48    | -78.24  | 66.81  |
|            |             | 0.1    | 9.31            | 8.65                                                               | 0.08         | 5.16 | 17.09 | -5.40                         | 0.36    | -44.56 | 83.55  | 0.39              | 0.35                                                                 | 0.08         | 0.09 | 0.60 | -10.52                          | 0.45    | -77.60  | 53.98  |
|            |             | 0.2    | 10.41           | 9.15                                                               | 0.09         | 5.48 | 16.83 | -11.11                        | 0.35    | -47.36 | 61.62  | 0.44              | 0.37                                                                 | 0.08         | 0.11 | 0.68 | -17.29                          | 0.42    | -74.90  | 55.00  |

| parameters |             |        | True Median PFS | Summary Statistics from simulations of the estimated KM Median PFS |              |      |       | Relative (%) bias: Median PFS |         |        |        | True 12 month PFS | Summary Statistics from simulations of the estimated KM 12 month PFS |              |      |      | Relative (%) bias: 12 Month PFS |         |        |        |       |
|------------|-------------|--------|-----------------|--------------------------------------------------------------------|--------------|------|-------|-------------------------------|---------|--------|--------|-------------------|----------------------------------------------------------------------|--------------|------|------|---------------------------------|---------|--------|--------|-------|
| N          | $\lambda_2$ | % ASCT |                 | median                                                             | Mean Std.err | min  | max   | mean                          | Std.err | min    | max    |                   | median                                                               | Mean Std.err | min  | max  | mean                            | Std.err | min    | max    |       |
| 60         | 0.108       | 0.3    | 11.78           | 9.51                                                               | 0.09         | 5.51 | 19.64 | -17.58                        | 0.34    | -53.23 | 66.70  | 0.49              | 0.38                                                                 | 0.09         | 0.08 | 0.67 | -22.77                          | 0.42    | -83.20 | 35.23  |       |
|            |             | 0.4    | 13.50           | 9.90                                                               | 0.10         | 6.14 | 21.76 | -24.97                        | 0.33    | -54.48 | 61.17  | 0.54              | 0.40                                                                 | 0.10         | 0.05 | 0.69 | -27.12                          | 0.43    | -90.55 | 26.13  |       |
|            | 0.054       | 0.01   | 8.47            | 8.44                                                               | 0.07         | 5.32 | 14.83 | 0.79                          | 0.32    | -37.23 | 75.18  | 0.34              | 0.34                                                                 | 0.06         | 0.15 | 0.60 | 0.42                            | 0.41    | -55.05 | 74.65  |       |
|            |             | 0.1    | 8.91            | 8.83                                                               | 0.07         | 5.24 | 13.76 | 0.17                          | 0.32    | -41.11 | 54.47  | 0.36              | 0.35                                                                 | 0.06         | 0.16 | 0.62 | -0.38                           | 0.42    | -55.73 | 73.65  |       |
|            |             | 0.2    | 9.37            | 9.18                                                               | 0.07         | 5.92 | 16.78 | -1.01                         | 0.32    | -36.83 | 79.11  | 0.38              | 0.37                                                                 | 0.07         | 0.16 | 0.61 | -2.30                           | 0.42    | -56.99 | 63.26  |       |
|            |             | 0.3    | 9.81            | 9.53                                                               | 0.08         | 6.07 | 15.33 | -1.62                         | 0.32    | -38.14 | 56.32  | 0.39              | 0.38                                                                 | 0.08         | 0.14 | 0.62 | -3.61                           | 0.43    | -64.24 | 56.06  |       |
|            | 0.036       | 0.01   | 8.49            | 8.38                                                               | 0.07         | 5.01 | 13.34 | -0.36                         | 0.32    | -41.01 | 57.20  | 0.34              | 0.34                                                                 | 0.06         | 0.12 | 0.55 | -1.22                           | 0.40    | -65.06 | 58.91  |       |
|            |             | 0.1    | 9.15            | 8.76                                                               | 0.07         | 4.92 | 14.15 | -3.38                         | 0.30    | -46.24 | 54.62  | 0.38              | 0.35                                                                 | 0.06         | 0.12 | 0.60 | -7.14                           | 0.38    | -68.97 | 59.37  |       |
|            |             | 0.2    | 9.96            | 9.11                                                               | 0.07         | 5.77 | 14.55 | -7.44                         | 0.29    | -42.09 | 46.04  | 0.42              | 0.37                                                                 | 0.07         | 0.14 | 0.61 | -11.77                          | 0.37    | -66.80 | 46.07  |       |
|            |             | 0.3    | 10.85           | 9.48                                                               | 0.08         | 5.59 | 17.59 | -11.25                        | 0.30    | -48.51 | 62.13  | 0.45              | 0.38                                                                 | 0.08         | 0.09 | 0.63 | -15.94                          | 0.37    | -80.10 | 39.39  |       |
|            | 0.027       | 0.01   | 8.50            | 8.40                                                               | 0.07         | 5.12 | 13.69 | -0.04                         | 0.32    | -39.71 | 61.15  | 0.34              | 0.34                                                                 | 0.06         | 0.15 | 0.56 | -0.70                           | 0.40    | -55.30 | 62.88  |       |
|            |             | 0.1    | 9.26            | 8.78                                                               | 0.07         | 5.55 | 13.82 | -4.07                         | 0.29    | -40.03 | 49.36  | 0.39              | 0.35                                                                 | 0.06         | 0.17 | 0.56 | -8.39                           | 0.37    | -55.23 | 44.12  |       |
|            |             | 0.2    | 10.25           | 9.14                                                               | 0.07         | 5.87 | 15.97 | -10.01                        | 0.29    | -42.70 | 55.89  | 0.43              | 0.36                                                                 | 0.07         | 0.14 | 0.63 | -15.50                          | 0.36    | -67.24 | 45.06  |       |
|            |             | 0.3    | 11.42           | 9.49                                                               | 0.08         | 6.09 | 15.75 | -15.63                        | 0.28    | -46.65 | 37.99  | 0.48              | 0.38                                                                 | 0.08         | 0.16 | 0.65 | -20.34                          | 0.35    | -65.62 | 35.79  |       |
|            | 100         | 0.108  | 0.01            | 8.47                                                               | 8.47         | 0.05 | 5.99  | 11.79                         | 0.20    | 0.24   | -29.31 | 39.27             | 0.34                                                                 | 0.34         | 0.05 | 0.19 | 0.50                            | 0.24    | 0.31   | -43.60 | 45.24 |
|            |             |        | 0.1             | 8.91                                                               | 8.75         | 0.05 | 6.34  | 13.43                         | -1.03   | 0.24   | -28.86 | 50.79             | 0.36                                                                 | 0.35         | 0.05 | 0.21 | 0.53                            | -1.31   | 0.31   | -42.11 | 47.00 |
|            |             |        | 0.2             | 9.37                                                               | 9.10         | 0.06 | 6.42  | 12.95                         | -2.29   | 0.25   | -31.46 | 38.23             | 0.38                                                                 | 0.36         | 0.05 | 0.17 | 0.59                            | -3.19   | 0.33   | -55.49 | 55.61 |
|            |             |        | 0.3             | 9.81                                                               | 9.45         | 0.06 | 6.31  | 14.36                         | -2.52   | 0.25   | -35.64 | 46.41             | 0.39                                                                 | 0.38         | 0.06 | 0.16 | 0.59                            | -3.25   | 0.33   | -60.14 | 50.65 |
|            |             | 0.054  | 0.01            | 8.49                                                               | 8.41         | 0.05 | 6.00  | 11.77                         | -0.41   | 0.24   | -29.33 | 38.61             | 0.34                                                                 | 0.34         | 0.05 | 0.18 | 0.50                            | -1.08   | 0.31   | -46.83 | 44.47 |
|            |             |        | 0.1             | 9.15                                                               | 8.77         | 0.05 | 5.69  | 13.64                         | -3.51   | 0.23   | -37.80 | 49.00             | 0.38                                                                 | 0.36         | 0.05 | 0.17 | 0.55                            | -6.14   | 0.29   | -54.07 | 44.63 |
| 0.2        |             |        | 9.96            | 9.15                                                               | 0.06         | 6.56 | 13.58 | -7.61                         | 0.22    | -34.17 | 36.32  | 0.42              | 0.37                                                                 | 0.05         | 0.20 | 0.58 | -11.99                          | 0.29    | -52.15 | 38.19  |       |
| 0.3        |             |        | 10.85           | 9.49                                                               | 0.06         | 6.89 | 14.06 | -11.96                        | 0.23    | -36.52 | 29.55  | 0.45              | 0.38                                                                 | 0.06         | 0.15 | 0.61 | -16.43                          | 0.29    | -66.86 | 34.66  |       |
| 0.036      |             | 0.01   | 8.50            | 8.39                                                               | 0.05         | 5.51 | 11.76 | -0.34                         | 0.25    | -35.19 | 38.47  | 0.34              | 0.34                                                                 | 0.05         | 0.18 | 0.49 | -1.10                           | 0.30    | -46.85 | 41.39  |       |
|            |             | 0.1    | 9.26            | 8.73                                                               | 0.05         | 5.85 | 13.10 | -5.21                         | 0.23    | -36.84 | 41.53  | 0.39              | 0.35                                                                 | 0.05         | 0.20 | 0.53 | -9.30                           | 0.29    | -49.09 | 37.31  |       |
|            |             | 0.2    | 10.25           | 9.14                                                               | 0.06         | 6.32 | 12.97 | -10.09                        | 0.22    | -38.35 | 26.61  | 0.43              | 0.37                                                                 | 0.05         | 0.20 | 0.53 | -15.30                          | 0.27    | -53.60 | 22.16  |       |
|            |             | 0.3    | 11.42           | 9.53                                                               | 0.06         | 6.69 | 13.78 | -15.95                        | 0.22    | -41.38 | 20.70  | 0.48              | 0.38                                                                 | 0.06         | 0.19 | 0.59 | -20.13                          | 0.27    | -61.31 | 22.22  |       |
| 0.027      |             | 0.01   | 8.50            | 8.41                                                               | 0.05         | 5.28 | 11.63 | -0.49                         | 0.25    | -37.83 | 36.87  | 0.34              | 0.34                                                                 | 0.05         | 0.19 | 0.49 | -1.13                           | 0.31    | -43.95 | 41.02  |       |
|            |             | 0.1    | 9.31            | 8.75                                                               | 0.05         | 6.20 | 12.86 | -5.33                         | 0.23    | -33.45 | 38.07  | 0.39              | 0.35                                                                 | 0.05         | 0.16 | 0.53 | -9.96                           | 0.30    | -58.36 | 34.81  |       |
|            |             | 0.2    | 10.41           | 9.20                                                               | 0.06         | 6.10 | 13.83 | -11.40                        | 0.22    | -41.37 | 32.78  | 0.44              | 0.37                                                                 | 0.05         | 0.22 | 0.57 | -16.77                          | 0.27    | -50.81 | 28.90  |       |
|            |             | 0.3    | 11.78           | 9.49                                                               | 0.06         | 6.80 | 13.61 | -19.03                        | 0.21    | -42.30 | 15.48  | 0.49              | 0.38                                                                 | 0.06         | 0.18 | 0.56 | -23.13                          | 0.27    | -64.31 | 12.80  |       |
| 1000       |             | 0.108  | 0.01            | 8.47                                                               | 8.48         | 0.02 | 7.60  | 9.73                          | 0.10    | 0.08   | -10.28 | 14.87             | 0.34                                                                 | 0.34         | 0.02 | 0.29 | 0.40                            | 0.08    | 0.10   | -14.41 | 16.98 |
|            |             |        | 0.2             | 9.37                                                               | 9.13         | 0.02 | 8.15  | 10.23                         | -2.47   | 0.08   | -12.96 | 9.16              | 0.38                                                                 | 0.37         | 0.02 | 0.31 | 0.43                            | -2.54   | 0.10   | -17.24 | 14.11 |

| parameters |             |        | True Median PFS | Summary Statistics from simulations of the estimated KM Median PFS |              |      |       | Relative (%) bias: Median PFS |         |        |        | True 12 month PFS | Summary Statistics from simulations of the estimated KM 12 month PFS |              |      |      | Relative (%) bias: 12 Month PFS |         |        |        |
|------------|-------------|--------|-----------------|--------------------------------------------------------------------|--------------|------|-------|-------------------------------|---------|--------|--------|-------------------|----------------------------------------------------------------------|--------------|------|------|---------------------------------|---------|--------|--------|
| N          | $\lambda_2$ | % ASCT |                 | median                                                             | Mean Std.err | min  | max   | mean                          | Std.err | min    | max    |                   | median                                                               | Mean Std.err | min  | max  | mean                            | Std.err | min    | max    |
|            |             | 0.3    | 9.81            | 9.50                                                               | 0.02         | 8.41 | 10.61 | -3.24                         | 0.08    | -14.25 | 8.11   | 0.39              | 0.38                                                                 | 0.02         | 0.32 | 0.44 | -3.34                           | 0.11    | -19.13 | 11.84  |
|            |             | 0.4    | 10.23           | 9.87                                                               | 0.02         | 8.60 | 11.17 | -3.52                         | 0.08    | -15.90 | 9.16   | 0.41              | 0.40                                                                 | 0.02         | 0.33 | 0.47 | -3.92                           | 0.11    | -20.16 | 13.20  |
|            | 0.054       | 0.01   | 8.49            | 8.45                                                               | 0.02         | 7.52 | 9.46  | -0.37                         | 0.08    | -11.39 | 11.46  | 0.34              | 0.34                                                                 | 0.02         | 0.29 | 0.41 | -0.73                           | 0.10    | -14.91 | 18.38  |
|            |             | 0.1    | 9.15            | 8.77                                                               | 0.02         | 7.84 | 9.83  | -4.05                         | 0.08    | -14.36 | 7.37   | 0.38              | 0.35                                                                 | 0.02         | 0.30 | 0.41 | -6.61                           | 0.09    | -19.44 | 8.84   |
|            |             | 0.2    | 9.96            | 9.13                                                               | 0.02         | 8.11 | 10.23 | -8.30                         | 0.07    | -18.63 | 2.71   | 0.42              | 0.37                                                                 | 0.02         | 0.32 | 0.42 | -11.96                          | 0.09    | -24.29 | 0.77   |
|            |             | 0.3    | 10.85           | 9.49                                                               | 0.02         | 8.22 | 10.68 | -12.55                        | 0.07    | -24.25 | -1.54  | 0.45              | 0.38                                                                 | 0.02         | 0.31 | 0.45 | -16.21                          | 0.09    | -31.12 | -1.89  |
|            |             | 0.4    | 11.82           | 9.87                                                               | 0.02         | 8.60 | 11.17 | -16.48                        | 0.07    | -27.19 | -5.50  | 0.49              | 0.40                                                                 | 0.02         | 0.33 | 0.47 | -19.51                          | 0.09    | -33.12 | -5.17  |
|            | 0.036       | 0.01   | 8.50            | 8.46                                                               | 0.02         | 7.43 | 9.50  | -0.35                         | 0.08    | -12.52 | 11.81  | 0.34              | 0.34                                                                 | 0.02         | 0.29 | 0.39 | -0.87                           | 0.10    | -15.97 | 12.69  |
|            |             | 0.1    | 9.26            | 8.77                                                               | 0.02         | 7.73 | 10.13 | -5.13                         | 0.08    | -16.50 | 9.42   | 0.39              | 0.35                                                                 | 0.02         | 0.30 | 0.41 | -8.57                           | 0.09    | -21.96 | 6.06   |
|            |             | 0.2    | 10.25           | 9.12                                                               | 0.02         | 8.18 | 10.27 | -10.84                        | 0.07    | -20.14 | 0.22   | 0.43              | 0.37                                                                 | 0.02         | 0.31 | 0.43 | -15.34                          | 0.09    | -28.63 | -1.48  |
|            |             | 0.3    | 11.42           | 9.49                                                               | 0.02         | 8.27 | 10.78 | -16.85                        | 0.07    | -27.53 | -5.62  | 0.48              | 0.38                                                                 | 0.02         | 0.31 | 0.45 | -20.57                          | 0.09    | -35.44 | -6.49  |
|            |             | 0.4    | 12.80           | 9.83                                                               | 0.02         | 8.58 | 11.29 | -23.07                        | 0.07    | -32.96 | -11.80 | 0.53              | 0.40                                                                 | 0.02         | 0.31 | 0.46 | -24.77                          | 0.09    | -40.68 | -12.26 |
|            | 0.027       | 0.01   | 8.50            | 8.43                                                               | 0.02         | 7.37 | 9.64  | -0.67                         | 0.08    | -13.35 | 13.43  | 0.34              | 0.34                                                                 | 0.02         | 0.28 | 0.40 | -1.19                           | 0.10    | -18.48 | 15.29  |
|            |             | 0.1    | 9.31            | 8.77                                                               | 0.02         | 7.95 | 9.87  | -5.81                         | 0.07    | -14.67 | 5.94   | 0.39              | 0.35                                                                 | 0.02         | 0.31 | 0.42 | -9.73                           | 0.09    | -21.19 | 6.76   |
|            |             | 0.2    | 10.41           | 9.13                                                               | 0.02         | 8.13 | 10.33 | -12.22                        | 0.07    | -21.93 | -0.76  | 0.44              | 0.37                                                                 | 0.02         | 0.31 | 0.42 | -16.95                          | 0.09    | -30.22 | -4.39  |
|            |             | 0.3    | 11.78           | 9.47                                                               | 0.02         | 8.26 | 10.55 | -19.49                        | 0.07    | -29.85 | -10.46 | 0.49              | 0.38                                                                 | 0.02         | 0.31 | 0.44 | -22.77                          | 0.09    | -36.81 | -10.94 |
|            |             | 0.4    | 13.50           | 9.82                                                               | 0.02         | 8.44 | 11.19 | -27.09                        | 0.06    | -37.50 | -17.13 | 0.54              | 0.40                                                                 | 0.02         | 0.33 | 0.46 | -27.25                          | 0.08    | -39.44 | -16.18 |

Supplementary figure 1. Distribution of relative (%) bias by proportion of relapsed and/or refractory WM patients who receive NPT prior to progression (Panels A and B) and by ratio between hazard rate of the group of patients who remain on study and the hazard rate of the group of patients who come off study prior to progression and by the specific value of the hazard rates themselves (Panels C and D assuming 20% of the patients are informatively censored.) Results are shown with  $n=40$  patients and assume non-informative censoring exists. Panels A and C show the impact on the 12-month PFS estimates and Panels B and D show the impact on the median PFS. The x-axis in Panels A and B is the proportion of patients who receive NPT prior to progression. The x-axis in Panels C and D is the hazard ratio ( $\lambda_2(t)/\lambda_1(t)$ ). The white boxes in Panels C and D correspond to  $\lambda_1(t)=0.03$  and the grey boxes correspond to  $\lambda_1(t)=0.06$ .

Supplementary figure 2. Distribution of relative (%) bias by proportion of MM patients who undergo transplant prior to progression (Panels A and B) and by ratio between hazard rate of the group of patients who remain on study and the hazard rate of the group of patients who undergo transplant prior to progression and by the specific value of the hazard rates themselves (Panels C and D assuming 40% of the patients are informatively censored.) Results are shown with  $n=60$  patients and assuming non-informative censoring exists. Panels A and C show the impact on the 12-month PFS estimates and Panels B and D show the impact on the median PFS. The x-axis in Panels A and B is the proportion of patients who undergo transplant prior to progression. The x-axis in Panels C and D is the hazard ratio ( $\lambda_2(t)/\lambda_1(t)$ ). The white boxes in Panels C and D correspond to  $\lambda_1(t)=0.036$  and the grey boxes correspond to  $\lambda_1(t)=0.108$ .

**Panel A: WM, N=40, 12 month estimate. Case with NI censoring**

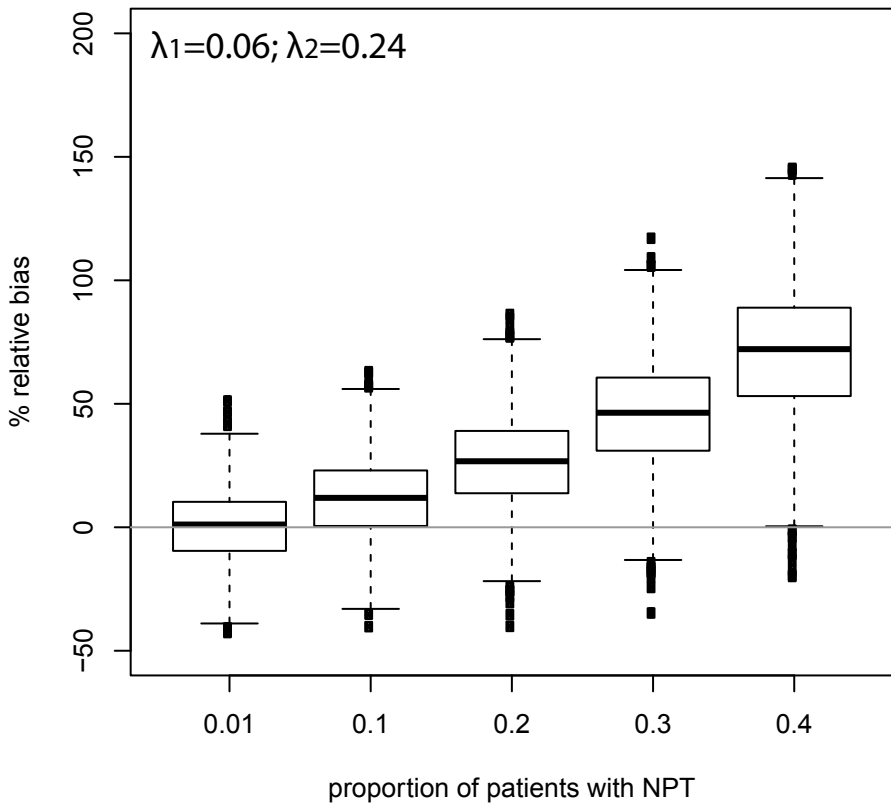

**Panel B: WM, N=40, median estimate. Case with NI censoring**

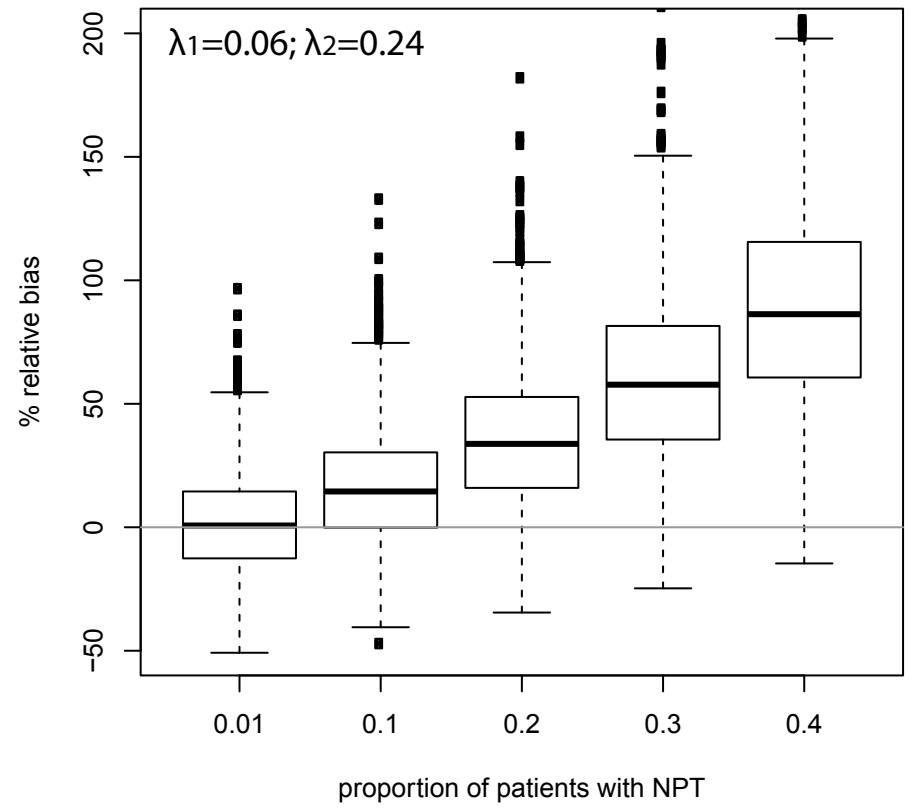

**Panel C: WM, N=40, 12 month estimate, proportion=0.20. Case with NI censoring**

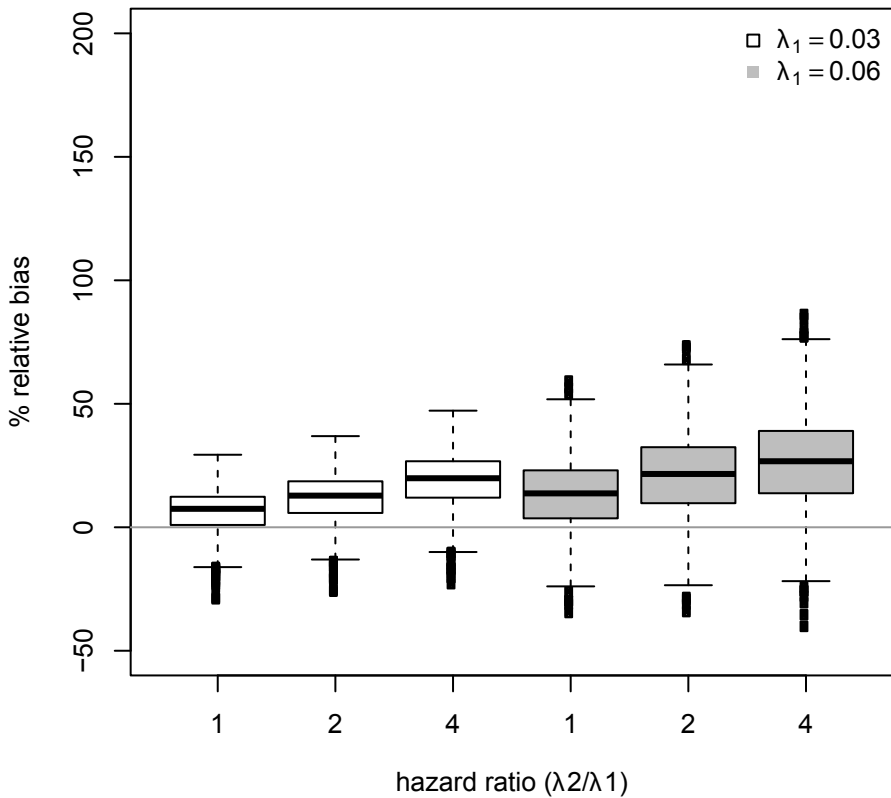

**Panel D: WM, N=40, median estimate, proportion=0.20. Case with NI censoring**

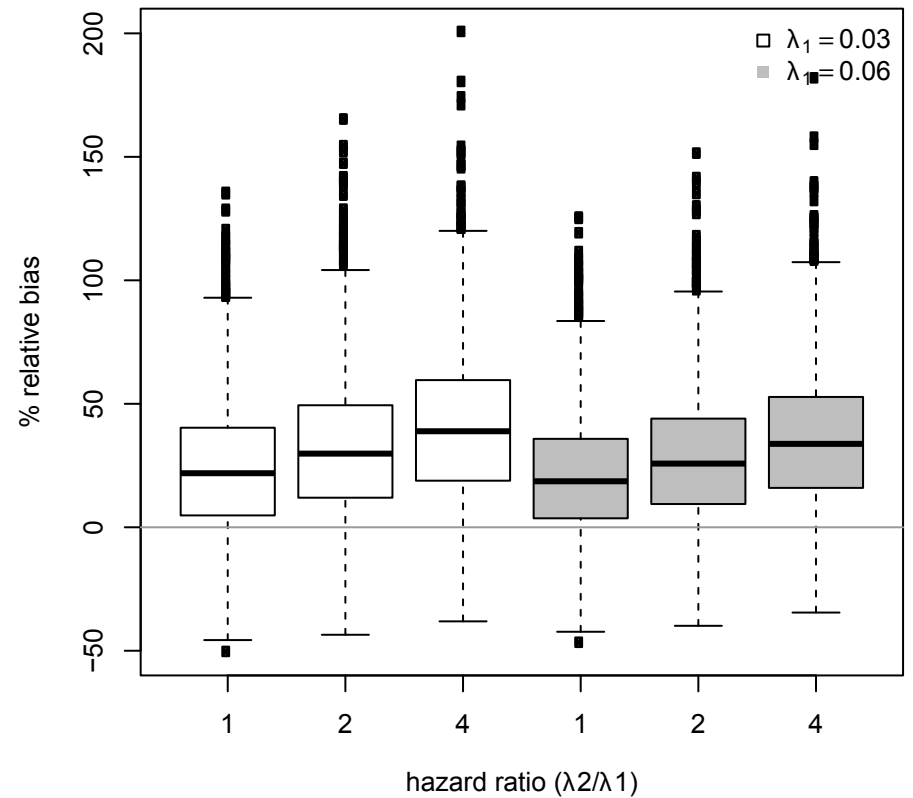

**Panel A: MM, N=60, 12 month estimate.**  
**Case with NI censoring**

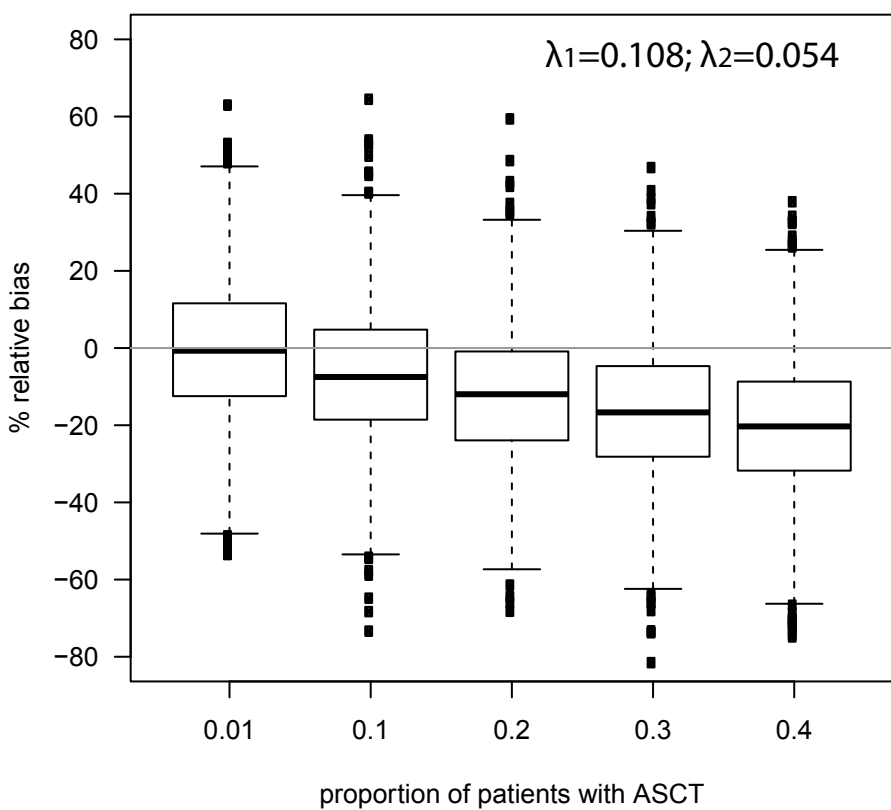

**Panel B: MM, N=60, median estimate.**  
**Case with NI censoring**

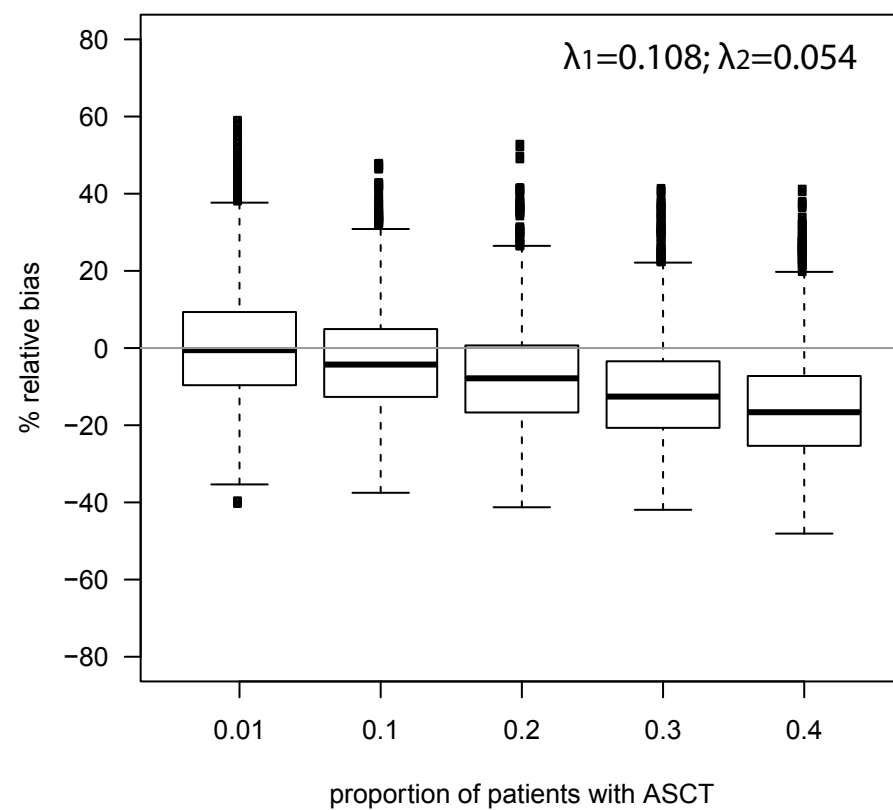

**Panel C: MM, N=60, 12 month estimate, proportion=0.40.**  
**Case with NI censoring**

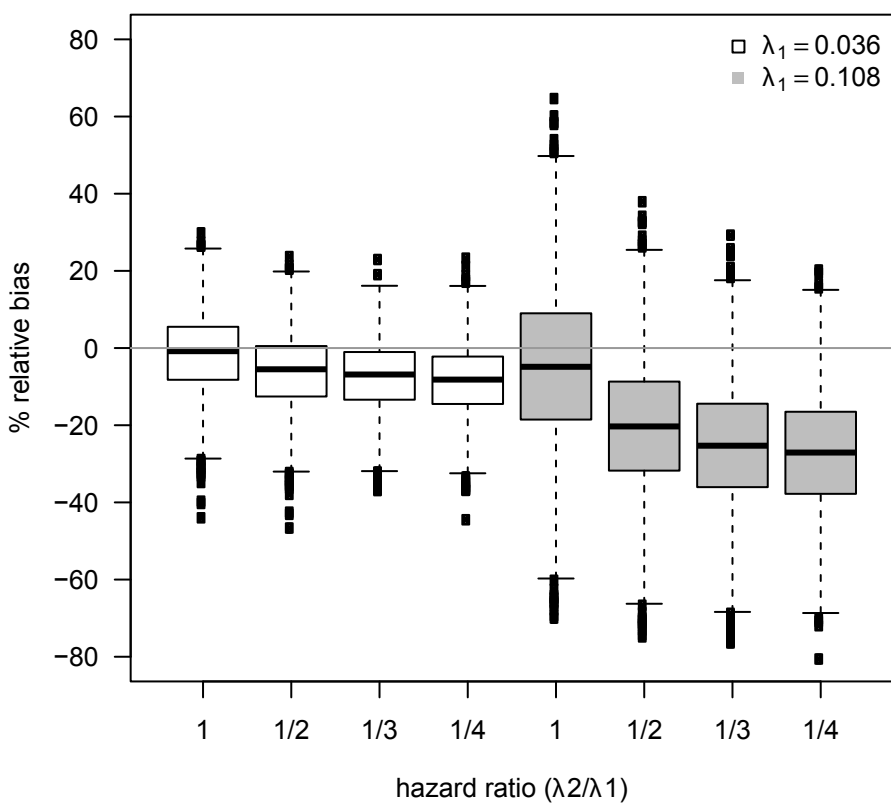

**Panel D: MM, N=60, median estimate, proportion=0.40.**  
**Case with NI censoring**

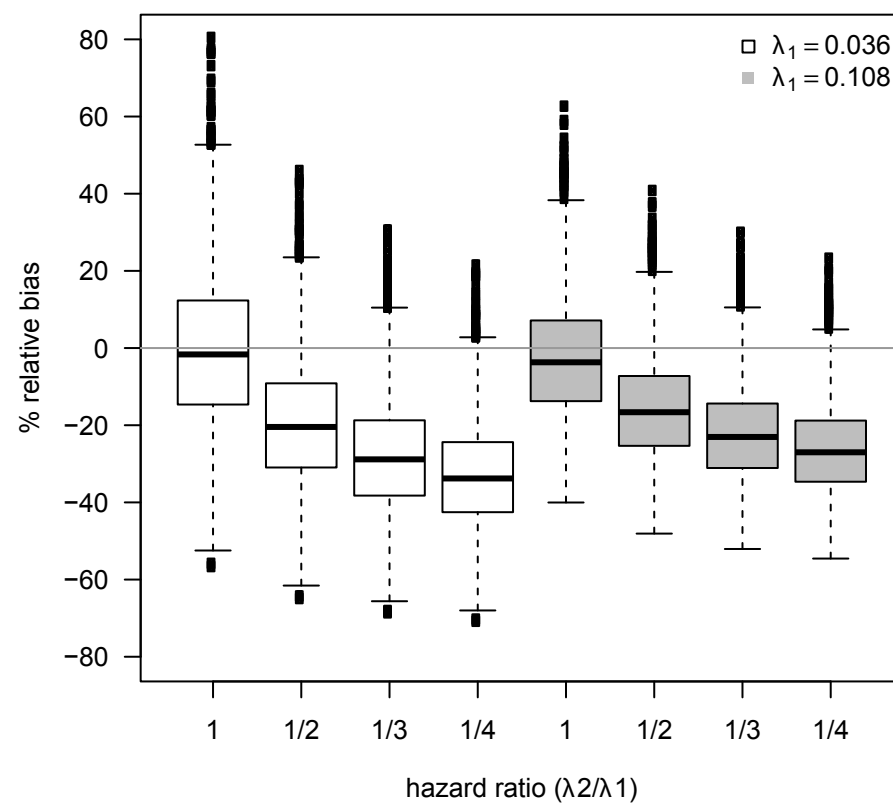

Supplement: supp_JCO.2014.55.6340_Data_Supplement_JCO.2014.55.6340.pdf [file supp_JCO.2014.55.6340_Data_Supplement_JCO.2014.55.6340.pdf]
